# Supplementary material for: Thermally activated delayed fluorescence poly(dendrimer)s – detrapping excitons for reverse intersystem crossing
Source: Royal Society of Chemistry journal article supplement (doi:10.1039/d1tc05151b), 2022-01-01
Supplement: d1tc05151b1.pdf [file d1tc05151b1.pdf]

## Supporting Information

### Thermally Activated Delayed Fluorescence Poly(dendrimer)s – Detrapping Excitons for Reverse Intersystem Crossing

*Authors: Emma V. Puttock<sup>†</sup>, Chandana Sampath Kumara Ranasinghe<sup>†</sup>, Mohammad Babazadeh<sup>†</sup>, Jos C. M. Kistemaker<sup>†</sup>, Junhyuk Jang<sup>†</sup>, Mile Gao<sup>†</sup>, David M. Huang<sup>¥</sup>, Chihaya Adachi<sup>‡</sup>, Paul L. Burn<sup>†\*</sup> and Paul E. Shaw<sup>†</sup>.*

<sup>†</sup>Centre for Organic Photonics & Electronics (COPE), School of Chemistry & Molecular Biosciences and School of Mathematics & Physics, University of Queensland, St Lucia, QLD 4072, Australia

<sup>¥</sup>Department of Chemistry, School of Physical Sciences, The University of Adelaide, Adelaide, South Australia, 5005, Australia

<sup>‡</sup>Center for Organic Photonics and Electronics Research (OPERA), Kyushu University, 744 Motooka, Nishi, Fukuoka 819-0395, Japan

\*p.burn2@uq.edu.au

**Table S1.** Thermal stability of **Da**, **Pa**, **Db** and **Pb**.

| Compound | $T_{\text{decomp}}$ (°C) <sup>a</sup> |
|----------|---------------------------------------|
| Da       | 443                                   |
| Pa       | 430                                   |
| Db       | 536                                   |
| Pb       | 440                                   |

<sup>a</sup> decomposition temperature determined by 5 wt% loss.

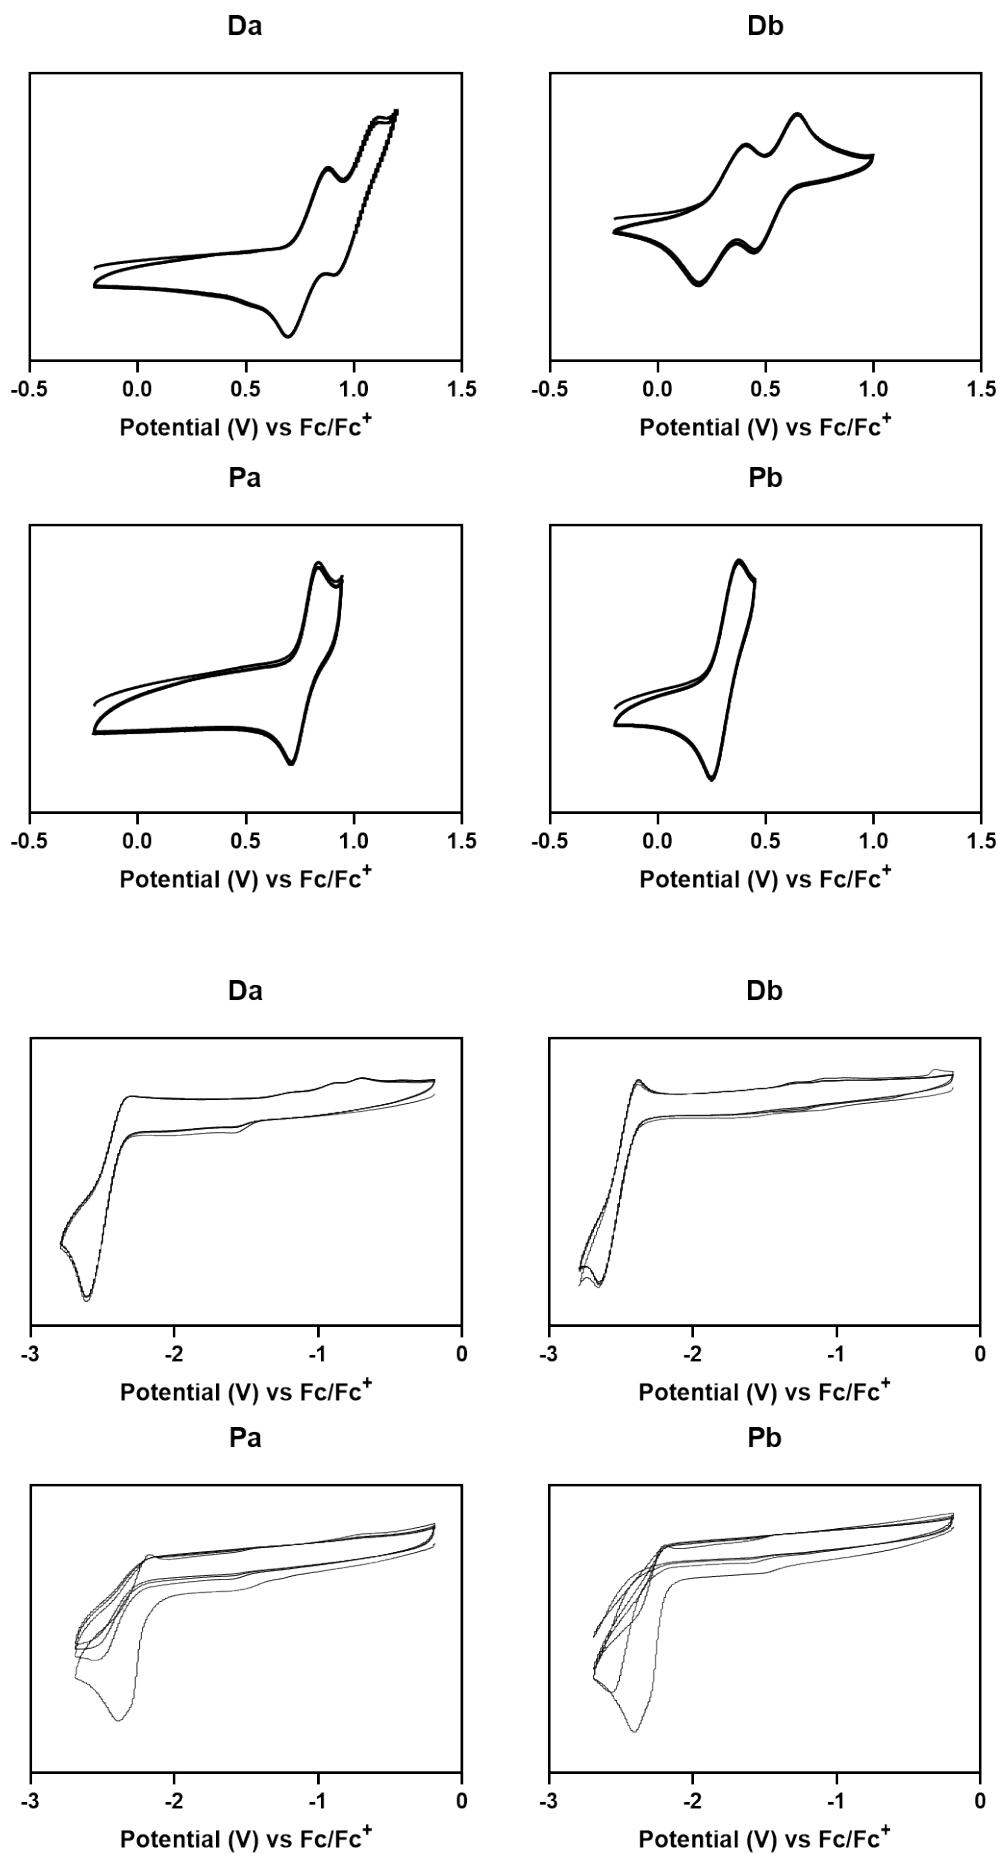

**Figure S1.** Cyclic voltammograms of **Da**, **Pa**, **Db** and **Pb** in dichloromethane (top) or tetrahydrofuran (bottom) in the presence of 0.1 M tetra-*n*-butylammonium perchlorate at room temperature.

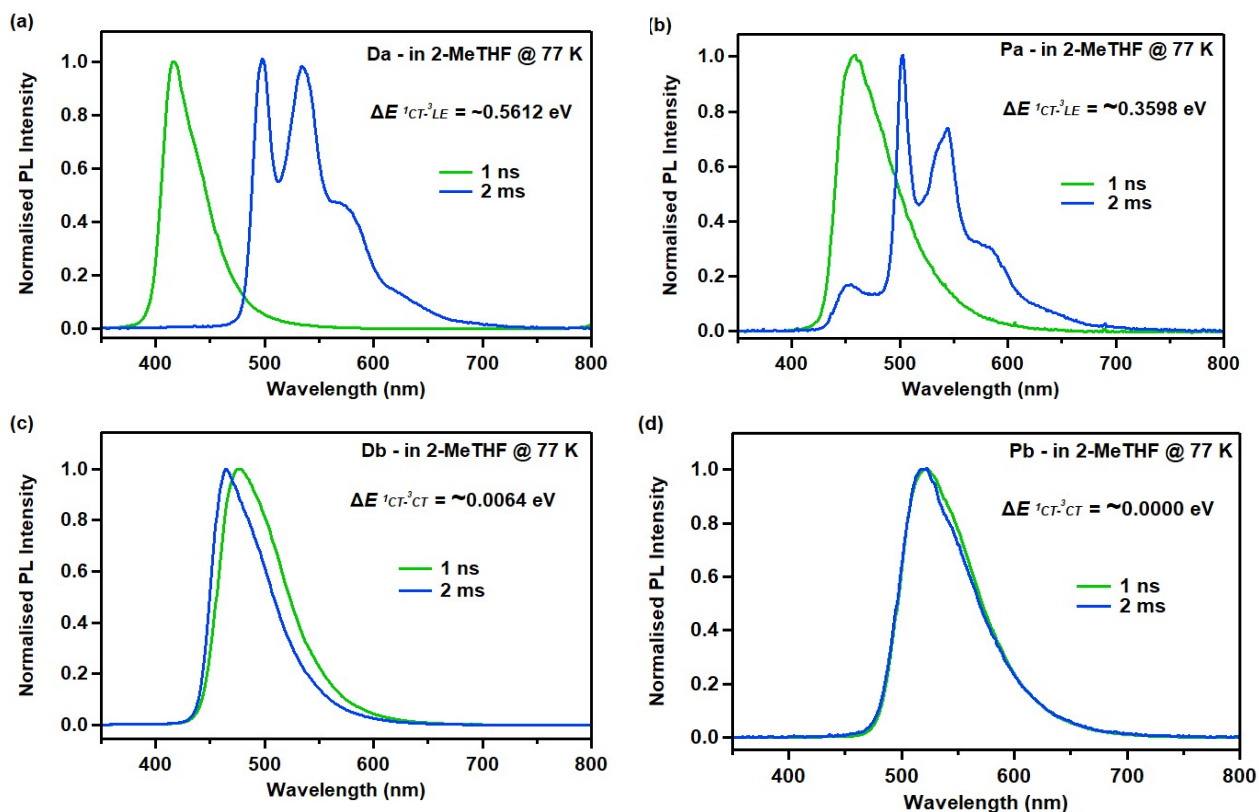

**Figure S2.** Solution PL spectra measured at 77 K and the estimated energy difference estimated using the difference in energy between the onset of the prompt PL and the phosphorescence of (a) **Da**, (b) **Pa** (c) **Db** and (d) **Pb**.

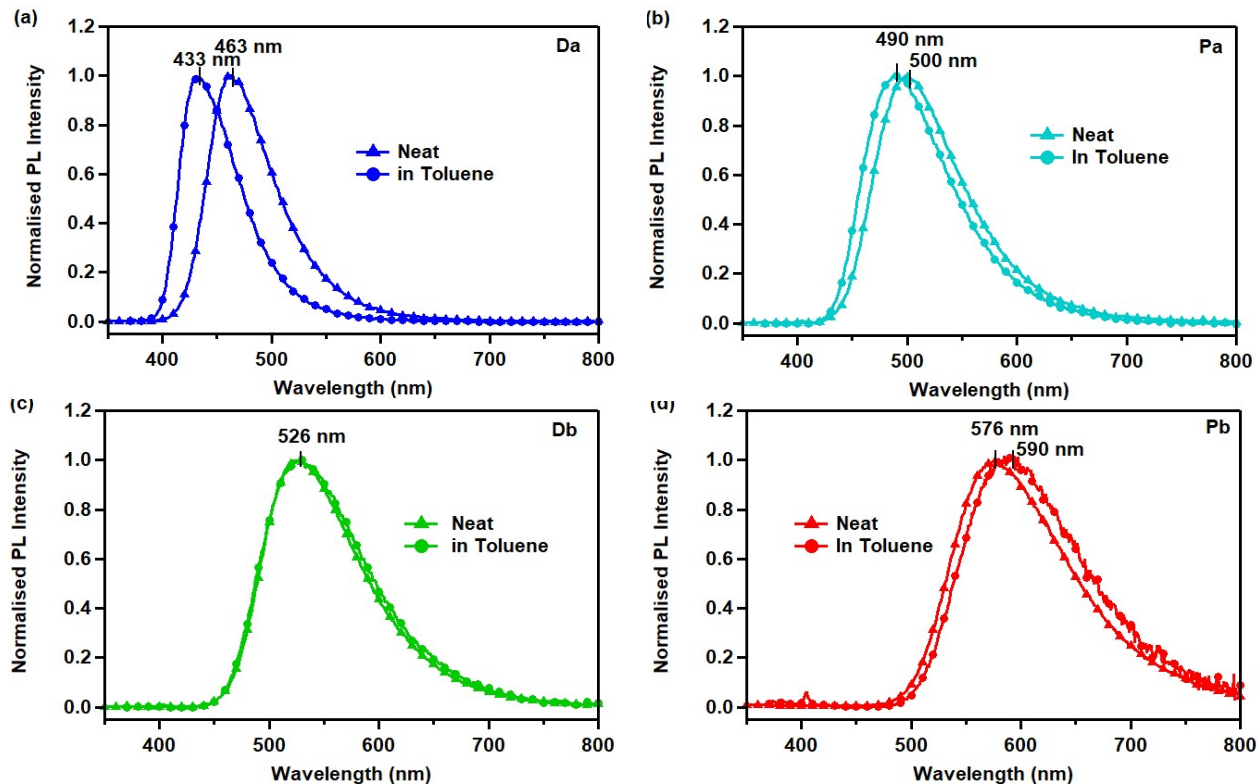

**Figure S3.** The steady-state PL spectra in toluene and neat films of (a) **Da**, (b) **Pa** (c) **Db** and (d) **Pb** measured at 300 K.

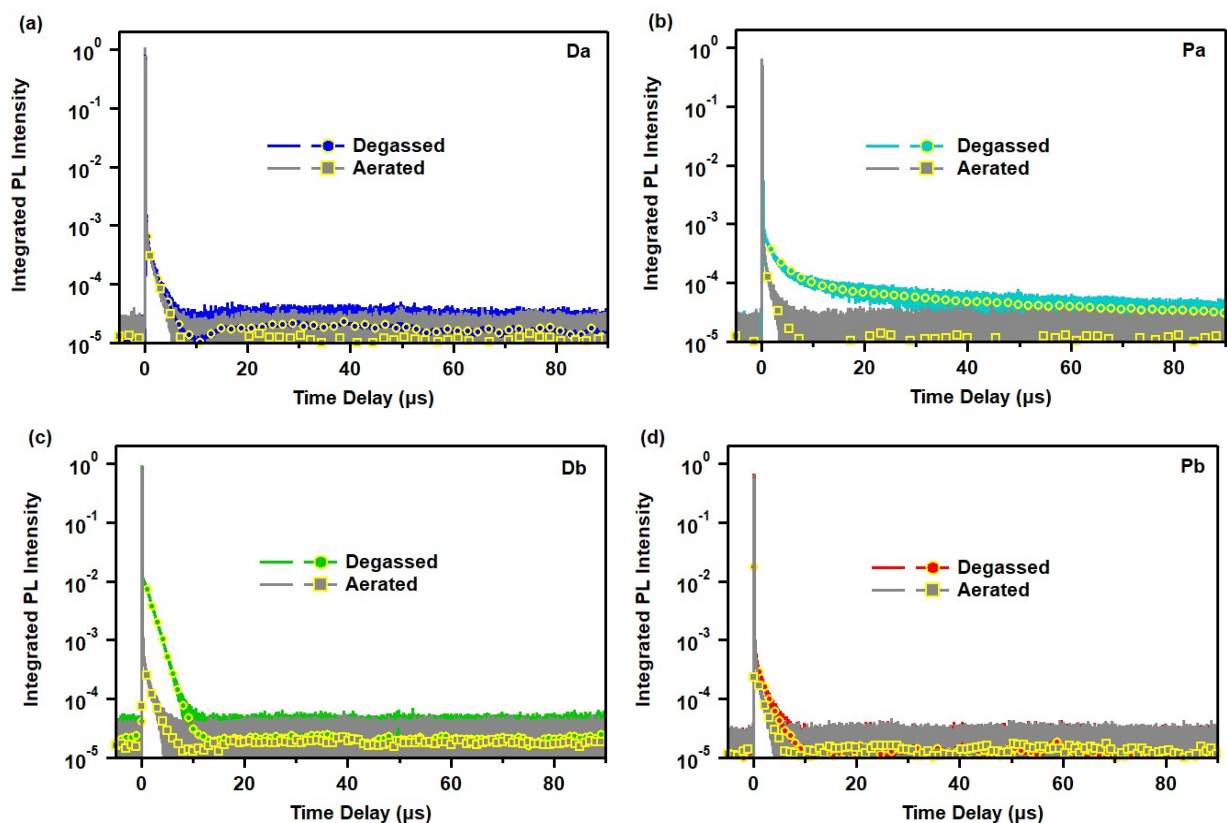

**Figure S4.** PL decay of (a) **Da**, (b) **Pa**, (c) **Db** and (d) **Pb** in deoxygenated and aerated toluene solution at 300 K.

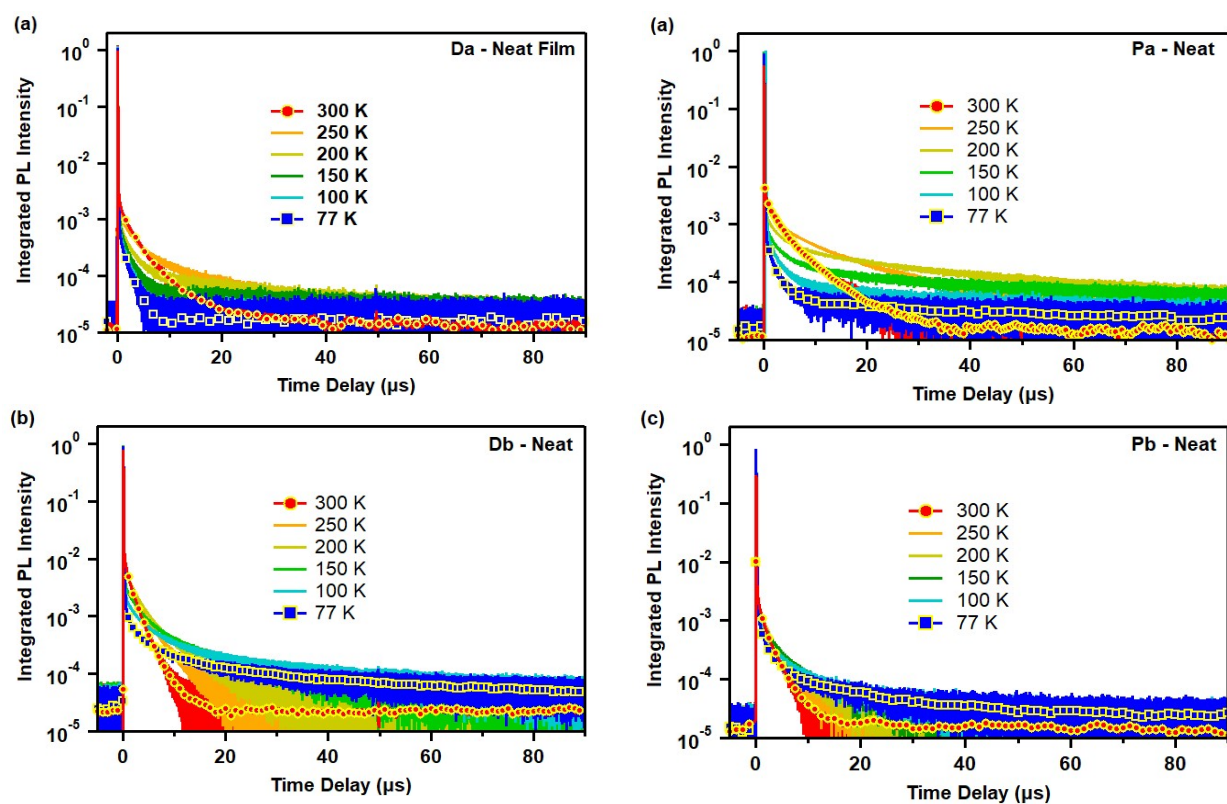

**Figure S5.** PL decay curves of neat films of (a) **Pa**, (b) **Db** and (c) **Pb** at temperatures varying between 77–300 K.

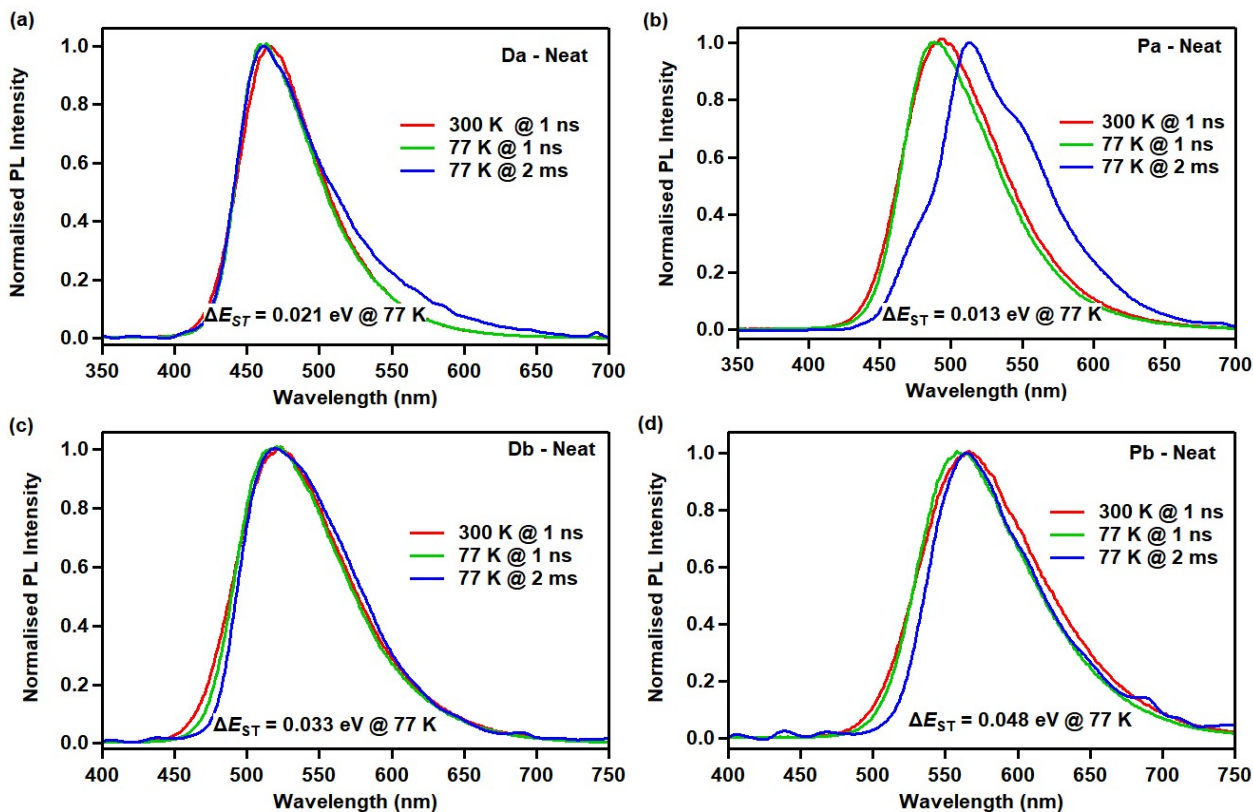

**Figure S6.** PL spectra of the neat films measured at 300 K (prompt) and 77 K (prompt and delayed) and the estimated energy difference calculated using the short wavelength onsets for the prompt and delayed components at 77 K for (a) **Da**, (b) **Pa** (c) **Db** and (d) **Pb**.

(a)

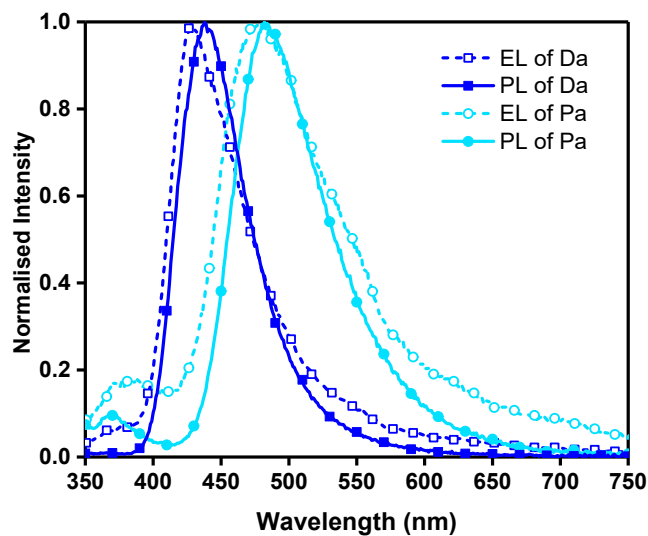

(b)

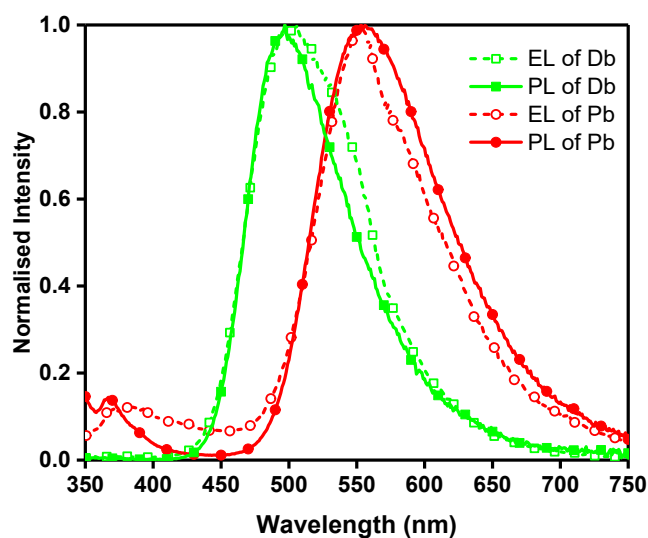

**Figure S7.** Comparison of EL and PL spectra of MCP blended film with (a) **Da** and **Pa**, (b) **Db** and **Pb**

**Atom coordinates for all optimized geometries and the energies of all optimized ground-state structures of the compounds Da, Ma, Db and Mb.**

*Atom coordinates for optimized S0 structure of Da at B3LYP/6-31G(d) level of theory (energy=-3672.4636 a.u.)*

|   |             |             |             |
|---|-------------|-------------|-------------|
| C | -0.04246800 | -1.22218500 | -2.19705100 |
| C | -0.03616500 | -1.20864900 | -3.59450800 |
| C | 0.00000000  | 0.00000000  | -4.28658000 |
| C | 0.03616500  | 1.20864800  | -3.59450800 |
| C | 0.04246800  | 1.22218500  | -2.19705100 |
| C | 0.00000000  | 0.00000000  | -1.48411400 |
| C | 0.00000000  | 0.00000000  | -0.05235900 |

|   |             |              |             |
|---|-------------|--------------|-------------|
| N | 0.00000000  | 0.00000000   | 1.11045700  |
| C | -2.82789700 | 4.66075800   | -2.29511700 |
| C | -2.39824400 | 5.82295800   | -1.61306800 |
| C | -1.16728700 | 5.79225100   | -0.94322100 |
| C | -0.38600500 | 4.63502800   | -0.96326100 |
| C | -0.84520600 | 3.49256700   | -1.66072900 |
| C | -2.07214700 | 3.49269700   | -2.32549200 |
| C | 0.89469100  | 4.28519300   | -0.37875200 |
| C | 1.16488500  | 2.94523700   | -0.74483100 |
| N | 0.09225800  | 2.45939500   | -1.51238300 |
| C | 1.82603900  | 4.99697100   | 0.38004800  |
| C | 3.02507400  | 4.38828800   | 0.77345800  |
| C | 3.26745800  | 3.05220800   | 0.37777800  |
| C | 2.35784700  | 2.32156800   | -0.37958300 |
| C | 4.02367400  | 5.12983400   | 1.58418700  |
| C | -3.23649800 | 7.04849200   | -1.60805800 |
| C | -2.64534100 | 8.32509900   | -1.69547800 |
| C | -3.43770700 | 9.46400700   | -1.68611200 |
| C | -4.83942700 | 9.35922100   | -1.59424200 |
| C | -5.44141000 | 8.10270800   | -1.50840300 |
| C | -4.63896500 | 6.96289300   | -1.51413700 |
| C | 3.60979400  | 6.02225900   | 2.59200700  |
| C | 4.52948400  | 6.73641000   | 3.35798900  |
| C | 5.89400500  | 6.55768800   | 3.12421000  |
| C | 6.32660700  | 5.66421000   | 2.12474400  |
| C | 5.40536800  | 4.96080000   | 1.36200000  |
| C | 7.07271900  | 7.15985100   | 3.75675800  |
| C | 8.22656500  | 6.63457600   | 3.14030800  |
| H | 8.07714100  | 3.50073100   | 1.60873500  |
| C | -3.00618600 | 10.92821000  | -1.77792600 |
| C | -4.35824400 | 11.63977800  | -1.71862400 |
| C | -5.41231700 | 10.70959100  | -1.61292000 |
| C | -4.62918700 | 13.00297100  | -1.75597200 |
| C | -5.95858200 | 13.43732000  | -1.68828000 |
| C | -7.00347600 | 12.51318700  | -1.58423900 |
| C | -6.73833500 | 11.14249600  | -1.54571100 |
| C | 7.18145700  | 8.09519700   | 4.78819200  |
| C | 8.45277200  | 8.50175200   | 5.19941000  |
| C | 9.59846500  | 7.98137700   | 4.58856600  |
| C | 9.48907100  | 7.04358900   | 3.55450500  |
| H | 1.56565300  | -8.40541100  | -1.79590100 |
| H | 6.52113100  | -8.00513500  | -1.42681900 |
| H | 10.38621700 | 6.64490600   | 3.08625100  |
| H | 3.82400000  | -13.72988100 | -1.83614500 |
| H | 6.18015000  | -14.50089900 | -1.71666000 |
| H | 8.03054700  | -12.86484600 | -1.53247900 |
| H | 7.55409000  | -10.42842600 | -1.46425200 |
| H | 5.10351000  | -5.98573400  | -1.41624300 |
| H | -2.54837900 | -6.13459300  | 2.79402800  |
| H | -4.17963900 | -7.41271800  | 4.13396400  |
| H | -5.74033200 | -4.29460100  | 0.57063700  |
| C | 2.82789700  | -4.66075800  | -2.29511700 |
| C | 2.39824500  | -5.82295900  | -1.61306800 |
| C | 1.16728700  | -5.79225100  | -0.94322100 |
| C | 0.38600500  | -4.63502800  | -0.96326100 |

|   |              |              |             |
|---|--------------|--------------|-------------|
| C | 0.84520600   | -3.49256700  | -1.66072900 |
| C | 2.07214700   | -3.49269700  | -2.32549200 |
| C | -0.89469100  | -4.28519300  | -0.37875200 |
| C | -1.16488400  | -2.94523700  | -0.74483200 |
| N | -0.09225800  | -2.45939500  | -1.51238300 |
| C | -1.82603800  | -4.99697100  | 0.38004800  |
| C | -3.02507400  | -4.38828800  | 0.77345800  |
| C | -3.26745800  | -3.05220800  | 0.37777800  |
| C | -2.35784700  | -2.32156800  | -0.37958300 |
| C | -4.02367400  | -5.12983300  | 1.58418700  |
| C | 3.23649800   | -7.04849200  | -1.60805800 |
| C | 2.64534100   | -8.32509900  | -1.69547800 |
| C | 3.43770700   | -9.46400700  | -1.68611200 |
| C | 4.83942700   | -9.35922100  | -1.59424200 |
| C | 5.44141000   | -8.10270800  | -1.50840300 |
| C | 4.63896500   | -6.96289400  | -1.51413700 |
| C | -3.60979400  | -6.02225900  | 2.59200700  |
| C | -4.52948400  | -6.73641000  | 3.35798900  |
| C | -5.89400500  | -6.55768700  | 3.12421000  |
| C | -6.32660700  | -5.66421000  | 2.12474400  |
| C | -5.40536800  | -4.96080000  | 1.36200000  |
| C | -7.07271900  | -7.15985000  | 3.75675800  |
| C | -8.22656500  | -6.63457600  | 3.14030800  |
| C | 7.85346400   | 5.63341100   | 2.04653600  |
| C | 3.00618600   | -10.92821000 | -1.77792600 |
| C | 4.35824300   | -11.63977800 | -1.71862400 |
| C | 5.41231700   | -10.70959100 | -1.61292000 |
| C | 4.62918700   | -13.00297100 | -1.75597200 |
| C | 5.95858200   | -13.43732000 | -1.68828000 |
| C | 7.00347600   | -12.51318800 | -1.58423900 |
| C | 6.73833400   | -11.14249700 | -1.54571100 |
| C | -7.18145700  | -8.09519700  | 4.78819200  |
| C | -8.45277200  | -8.50175100  | 5.19941000  |
| C | -9.59846500  | -7.98137600  | 4.58856600  |
| C | -9.48907100  | -7.04358800  | 3.55450500  |
| H | -1.63581000  | -6.03429100  | 0.64009400  |
| H | 3.77074500   | -4.68709200  | -2.83318300 |
| H | -4.18370600  | -2.56742100  | 0.70070800  |
| H | -2.57283400  | -1.29504300  | -0.65702600 |
| H | -10.38621700 | -6.64490500  | 3.08625200  |
| H | 2.42925800   | -2.61664700  | -2.85768200 |
| H | 0.83456700   | -6.66228100  | -0.38428600 |
| H | -6.29425600  | -8.50271900  | 5.26645500  |
| H | -8.55265000  | -9.22865700  | 6.00121200  |
| H | -10.58118600 | -8.30714800  | 4.91910400  |
| H | -0.07631200  | -2.15350100  | -4.12602700 |
| H | 0.00000000   | 0.00000000   | -5.37248500 |
| H | 0.07631200   | 2.15350100   | -4.12602700 |
| H | -3.77074400  | 4.68709200   | -2.83318300 |
| H | -0.83456700  | 6.66228100   | -0.38428600 |
| H | -2.42925700  | 2.61664700   | -2.85768200 |
| H | 1.63581000   | 6.03429100   | 0.64009500  |
| H | 4.18370700   | 2.56742100   | 0.70070800  |
| H | 2.57283400   | 1.29504300   | -0.65702600 |
| H | -1.56565300  | 8.40541100   | -1.79590100 |



|   |             |              |             |
|---|-------------|--------------|-------------|
| H | -6.52113100 | 8.00513500   | -1.42681900 |
| H | -5.10351000 | 5.98573400   | -1.41624300 |
| H | 2.54837900  | 6.13459300   | 2.79402800  |
| H | 4.17963900  | 7.41271900   | 4.13396400  |
| H | 5.74033300  | 4.29460100   | 0.57063700  |
| H | -3.82400100 | 13.72988000  | -1.83614500 |
| H | -6.18015100 | 14.50089900  | -1.71666000 |
| H | -8.03054800 | 12.86484600  | -1.53247900 |
| H | -7.55409000 | 10.42842500  | -1.46425200 |
| H | 6.29425600  | 8.50271900   | 5.26645500  |
| H | 8.55265000  | 9.22865800   | 6.00121200  |
| H | 10.58118600 | 8.30714800   | 4.91910400  |
| C | -2.27464700 | 11.21713200  | -3.10806000 |
| H | -2.02391900 | 12.28119800  | -3.18924100 |
| H | -2.89688100 | 10.94592500  | -3.96686300 |
| C | -8.40295700 | -4.22434600  | 2.36517100  |
| H | -8.05397200 | -3.87713900  | 3.34287900  |
| H | -8.07714100 | -3.50073100  | 1.60873500  |
| C | 8.35950700  | 6.09550700   | 0.66194100  |
| H | 8.03182900  | 5.40262500   | -0.12186200 |
| H | 9.45501700  | 6.13072100   | 0.64242600  |
| H | -2.60611000 | 11.12527200  | 0.36819100  |
| C | -2.10726500 | 11.32533900  | -0.58544000 |
| H | -1.16685500 | 10.76219700  | -0.60494200 |
| H | -1.86039900 | 12.39262600  | -0.62516800 |
| H | -9.49916700 | -4.22929800  | 2.37534100  |
| C | 2.27464700  | -11.21713200 | -3.10806100 |
| H | -8.03182900 | -5.40262500  | -0.12186100 |
| H | 7.98089800  | 7.09291500   | 0.41683800  |
| C | 8.40295700  | 4.22434700   | 2.36517100  |
| H | 9.49916700  | 4.22929900   | 2.37534100  |
| H | 8.05397200  | 3.87714000   | 3.34287900  |
| H | 1.16685500  | -10.76219700 | -0.60494200 |
| C | 2.10726500  | -11.32534000 | -0.58544100 |
| H | 2.60611000  | -11.12527200 | 0.36819100  |
| H | 1.34079900  | -10.64618500 | -3.16765400 |
| H | 2.89688100  | -10.94592600 | -3.96686400 |
| H | 1.86039800  | -12.39262600 | -0.62516800 |
| H | 2.02391900  | -12.28119800 | -3.18924100 |
| C | -8.35950700 | -6.09550600  | 0.66194100  |
| H | -9.45501700 | -6.13072100  | 0.64242600  |
| H | -7.98089800 | -7.09291400  | 0.41683800  |
| C | -7.85346400 | -5.63341000  | 2.04653600  |
| H | -1.34079900 | 10.64618500  | -3.16765300 |

*Atom coordinates for optimized T1 structure Da at UCAM-B3LYP/6-31G(d) level of theory*

|   |             |             |             |
|---|-------------|-------------|-------------|
| C | -0.15747800 | -1.26246700 | -2.73866500 |
| C | -0.12661900 | -1.22363400 | -4.09514100 |
| C | 0.00026500  | -0.00002100 | -4.80853400 |
| C | 0.12705300  | 1.22360500  | -4.09508400 |
| C | 0.15766200  | 1.26243300  | -2.73862000 |
| C | 0.00000600  | -0.00001100 | -1.94736500 |
| C | -0.00006600 | -0.00000800 | -0.56851600 |
| N | -0.00013100 | 0.00000300  | 0.60628900  |

|   |             |              |             |
|---|-------------|--------------|-------------|
| C | -2.69691700 | 4.71152900   | -2.81055300 |
| C | -2.34558400 | 5.79061800   | -1.97806700 |
| C | -1.17472700 | 5.70467900   | -1.22264000 |
| C | -0.37823900 | 4.56920700   | -1.30607600 |
| C | -0.75464600 | 3.51034700   | -2.15209700 |
| C | -1.91939700 | 3.56843000   | -2.90907900 |
| C | 0.85951900  | 4.17020700   | -0.65933200 |
| C | 1.17526900  | 2.88864900   | -1.14435000 |
| N | 0.18447600  | 2.47790200   | -2.03987200 |
| C | 1.71635300  | 4.80207300   | 0.23315200  |
| C | 2.88990800  | 4.16404300   | 0.63917500  |
| C | 3.18758900  | 2.89036700   | 0.11811100  |
| C | 2.35223400  | 2.24428700   | -0.77775400 |
| C | 3.81660600  | 4.82126100   | 1.59231600  |
| C | -3.20601600 | 6.99667200   | -1.90538900 |
| C | -2.63664600 | 8.27487100   | -1.81274000 |
| C | -3.44946900 | 9.39137200   | -1.74049500 |
| C | -4.84384300 | 9.25776500   | -1.76231500 |
| C | -5.42426800 | 7.99883400   | -1.85538700 |
| C | -4.60245200 | 6.88060400   | -1.92471800 |
| C | 3.31875200  | 5.56757100   | 2.66892700  |
| C | 4.16875800  | 6.19508000   | 3.57124800  |
| C | 5.54230800  | 6.07470500   | 3.39939000  |
| C | 6.05635900  | 5.33075600   | 2.32934100  |
| C | 5.20547100  | 4.71014500   | 1.43320900  |
| C | 6.66639300  | 6.61389000   | 4.17402800  |
| C | 7.85971000  | 6.19735800   | 3.56762900  |
| H | 7.88711600  | 3.30593200   | 1.63384600  |
| C | -3.04365600 | 10.85613600  | -1.64412500 |
| C | -4.40526400 | 11.53739200  | -1.60724600 |
| C | -5.44130900 | 10.59564500  | -1.67693500 |
| C | -4.69607700 | 12.88904500  | -1.51880700 |
| C | -6.02972200 | 13.29632700  | -1.50045900 |
| C | -7.05814100 | 12.35837100  | -1.56995500 |
| C | -6.77137800 | 10.99937500  | -1.65894400 |
| C | 6.68858900  | 7.40516200   | 5.31676300  |
| C | 7.91885200  | 7.77763800   | 5.85042000  |
| C | 9.10631300  | 7.36465500   | 5.24910300  |
| C | 9.08176300  | 6.57104700   | 4.10262300  |
| H | 1.55518300  | -8.37999300  | -1.82182000 |
| H | 6.50383900  | -7.88115100  | -1.86482800 |
| H | 10.01273200 | 6.25351100   | 3.64061900  |
| H | 3.90069000  | -13.62788200 | -1.46399200 |
| H | 6.26872100  | -14.35330300 | -1.43130600 |
| H | 8.09137500  | -12.69103700 | -1.55446100 |
| H | 7.57532000  | -10.27137500 | -1.71281400 |
| H | 5.05088700  | -5.89342600  | -1.97046800 |
| H | -2.24511900 | -5.63429000  | 2.81377400  |
| H | -3.75683100 | -6.76048300  | 4.40194500  |
| H | -5.60472900 | -4.15349000  | 0.58975900  |
| C | 2.69697000  | -4.71166300  | -2.81063400 |
| C | 2.34560100  | -5.79073700  | -1.97814600 |
| C | 1.17474800  | -5.70475700  | -1.22271200 |
| C | 0.37830100  | -4.56926100  | -1.30614900 |
| C | 0.75474000  | -3.51041700  | -2.15217600 |

|   |              |              |             |
|---|--------------|--------------|-------------|
| C | 1.91948700   | -3.56853700  | -2.90915900 |
| C | -0.85944100  | -4.17021500  | -0.65939500 |
| C | -1.17514900  | -2.88864600  | -1.14441000 |
| N | -0.18434100  | -2.47793000  | -2.03993500 |
| C | -1.71629200  | -4.80205400  | 0.23308500  |
| C | -2.88983000  | -4.16398400  | 0.63910800  |
| C | -3.18747700  | -2.89030400  | 0.11803700  |
| C | -2.35210300  | -2.24425300  | -0.77783200 |
| C | -3.81654500  | -4.82117100  | 1.59225100  |
| C | 3.20599100   | -6.99681900  | -1.90546800 |
| C | 2.63657600   | -8.27499700  | -1.81280000 |
| C | 3.44936100   | -9.39152500  | -1.74055600 |
| C | 4.84374000   | -9.25796600  | -1.76239300 |
| C | 5.42420800   | -7.99905700  | -1.85548200 |
| C | 4.60243100   | -6.88079900  | -1.92481400 |
| C | -3.31870900  | -5.56750600  | 2.66885300  |
| C | -4.16873100  | -6.19498400  | 3.57118100  |
| C | -5.54227700  | -6.07455400  | 3.39933400  |
| C | -6.05631000  | -5.33058200  | 2.32929300  |
| C | -5.20540700  | -4.70999900  | 1.43315700  |
| C | -6.66637500  | -6.61369900  | 4.17398200  |
| C | -7.85968200  | -6.19711900  | 3.56759600  |
| C | 7.57920800   | 5.34477900   | 2.33735800  |
| C | 3.04349900   | -10.85627400 | -1.64417000 |
| C | 4.40508400   | -11.53757700 | -1.60730200 |
| C | 5.44116000   | -10.59586700 | -1.67700900 |
| C | 4.69585200   | -12.88923900 | -1.51885500 |
| C | 6.02948300   | -13.29656600 | -1.50051900 |
| C | 7.05793300   | -12.35864600 | -1.57003500 |
| C | 6.77121600   | -10.99964100 | -1.65903100 |
| C | -6.68859000  | -7.40497200  | 5.31671500  |
| C | -7.91886100  | -7.77740200  | 5.85038400  |
| C | -9.10631300  | -7.36437200  | 5.24907900  |
| C | -9.08174400  | -6.57076200  | 4.10260000  |
| H | -1.49175900  | -5.80175800  | 0.59138900  |
| H | 3.59561900   | -4.78583600  | -3.41406300 |
| H | -4.09297700  | -2.38908100  | 0.44311500  |
| H | -2.60703600  | -1.26513800  | -1.16702800 |
| H | -10.01270500 | -6.25318900  | 3.64060700  |
| H | 2.20863300   | -2.75351300  | -3.56270700 |
| H | 0.90297300   | -6.51313900  | -0.55119200 |
| H | -5.76524100  | -7.72862100  | 5.78831200  |
| H | -7.95387100  | -8.39473300  | 6.74281200  |
| H | -10.05841400 | -7.66280300  | 5.67709000  |
| H | -0.21361400  | -2.15641700  | -4.64266200 |
| H | 0.00034300   | -0.00000900  | -5.89081700 |
| H | 0.21415300   | 2.15639200   | -4.64258200 |
| H | -3.59557000  | 4.78567200   | -3.41398100 |
| H | -0.90297400  | 6.51307400   | -0.55112600 |
| H | -2.20851400  | 2.75339800   | -3.56263200 |
| H | 1.49178600   | 5.80176900   | 0.59145900  |
| H | 4.09310200   | 2.38917000   | 0.44319600  |
| H | 2.60719100   | 1.26517200   | -1.16693800 |
| H | -1.55525600  | 8.37990400   | -1.82177400 |
| H | -6.50389500  | 7.88089100   | -1.86472000 |

|   |             |              |             |
|---|-------------|--------------|-------------|
| H | -5.05087400 | 5.89321600   | -1.97035800 |
| H | 2.24516200  | 5.63431200   | 2.81385700  |
| H | 3.75684400  | 6.76056100   | 4.40201800  |
| H | 5.60480600  | 4.15365500   | 0.58980500  |
| H | -3.90094000 | 13.62771600  | -1.46395900 |
| H | -6.26899500 | 14.35305700  | -1.43125100 |
| H | -8.09159400 | 12.69072600  | -1.55437300 |
| H | -7.57545700 | 10.27108100  | -1.71271300 |
| H | 5.76523200  | 7.72877400   | 5.78837100  |
| H | 7.95384700  | 8.39496800   | 6.74285000  |
| H | 10.05840700 | 7.66312100   | 5.67710600  |
| C | -2.23163300 | 11.29448000  | -2.87329500 |
| H | -2.00278700 | 12.36387600  | -2.82243700 |
| H | -2.78412500 | 11.10634700  | -3.79805000 |
| C | -8.15054900 | -3.92664500  | 2.49617700  |
| H | -7.76187800 | -3.44388300  | 3.39706900  |
| H | -7.88699800 | -3.30568600  | 1.63382100  |
| C | 8.14053400  | 5.99806100   | 1.06442000  |
| H | 7.87661400  | 5.40955000   | 0.17978200  |
| H | 9.23244900  | 6.06089600   | 1.11306300  |
| H | -2.80477300 | 10.82550300  | 0.52650800  |
| C | -2.24408500 | 11.13212600  | -0.36086400 |
| H | -1.29510400 | 10.58625100  | -0.37265400 |
| H | -2.01658800 | 12.19917000  | -0.27058200 |
| H | -9.24258700 | -3.95690600  | 2.56756300  |
| C | 2.23144700  | -11.29460100 | -2.87332800 |
| H | -7.87658900 | -5.40929900  | 0.17975100  |
| H | 7.74511200  | 7.00914600   | 0.93330100  |
| C | 8.15065300  | 3.92689900   | 2.49620100  |
| H | 9.24269100  | 3.95720100   | 2.56757500  |
| H | 7.76201000  | 3.44412000   | 3.39709600  |
| H | 1.29496900  | -10.58632100 | -0.37268200 |
| C | 2.24393300  | -11.13222800 | -0.36089800 |
| H | 2.80464100  | -10.82561500 | 0.52646500  |
| H | 1.28311400  | -10.74988900 | -2.92378000 |
| H | 2.78393500  | -11.10649300 | -3.79809100 |
| H | 2.01640300  | -12.19926300 | -0.27060500 |
| H | 2.00256600  | -12.36398800 | -2.82245900 |
| C | -8.14052200 | -5.99780400  | 1.06439000  |
| H | -9.23244000 | -6.06059700  | 1.11304400  |
| H | -7.74514000 | -7.00890300  | 0.93326400  |
| C | -7.57916000 | -5.34454700  | 2.33732400  |
| H | -1.28328300 | 10.74980000  | -2.92375400 |

*Atom coordinates for optimized S1 structure of Da at CAM-B3LYP/6-31G(d) level of theory*

|   |             |             |            |
|---|-------------|-------------|------------|
| C | 0.87720400  | 0.21773700  | 3.44566800 |
| C | 0.79427900  | 0.54002100  | 4.78173700 |
| C | -0.44545600 | 0.71069300  | 5.42266300 |
| C | -1.61156300 | 0.53090000  | 4.66398900 |
| C | -1.55771900 | 0.20664300  | 3.32531900 |
| C | -0.30109800 | 0.03417200  | 2.62305600 |
| C | -0.23278700 | -0.10660900 | 1.23746400 |
| N | -0.17922900 | -0.26153100 | 0.07622500 |
| C | -4.73656900 | 3.19851300  | 2.41876700 |

|   |              |              |             |
|---|--------------|--------------|-------------|
| C | -5.81550300  | 2.71567700   | 1.65640800  |
| C | -5.80959100  | 1.37349500   | 1.24280100  |
| C | -4.75481700  | 0.55191800   | 1.59329500  |
| C | -3.69442900  | 1.06378400   | 2.37004800  |
| C | -3.66884300  | 2.39282400   | 2.78249600  |
| C | -4.42594100  | -0.84032300  | 1.31805600  |
| C | -3.19270700  | -1.09204300  | 1.95504200  |
| N | -2.76020400  | 0.06017900   | 2.59423200  |
| C | -5.06664800  | -1.85591700  | 0.63459200  |
| C | -4.48605300  | -3.13402400  | 0.58006200  |
| C | -3.25936600  | -3.35466400  | 1.23205400  |
| C | -2.60010900  | -2.35211600  | 1.92397900  |
| C | -5.16020500  | -4.23081700  | -0.14744800 |
| C | -6.93530700  | 3.60918700   | 1.28741800  |
| C | -6.70314600  | 4.95898200   | 0.98018300  |
| C | -7.75948100  | 5.78109900   | 0.63676800  |
| C | -9.06734100  | 5.27862500   | 0.59337400  |
| C | -9.31486800  | 3.94450700   | 0.89452300  |
| C | -8.24967700  | 3.12225700   | 1.23736600  |
| C | -5.11471500  | -5.54561700  | 0.33904800  |
| C | -5.74588700  | -6.58702800  | -0.32795500 |
| C | -6.43473000  | -6.31556900  | -1.50437000 |
| C | -6.48787000  | -5.00769100  | -2.00581400 |
| C | -5.86040600  | -3.97423000  | -1.33665700 |
| C | -7.18186000  | -7.19269300  | -2.41189500 |
| C | -7.68137800  | -6.41422100  | -3.46545900 |
| H | -6.06190100  | -3.45628400  | -4.31725200 |
| C | -7.72962400  | 7.25582800   | 0.25822600  |
| C | -9.20681300  | 7.52419600   | 0.00395600  |
| C | -9.97096200  | 6.36556700   | 0.20175400  |
| C | -9.81985300  | 8.70756400   | -0.37445600 |
| C | -11.20243700 | 8.72737500   | -0.55489000 |
| C | -11.96022400 | 7.57410300   | -0.35813800 |
| C | -11.34961400 | 6.38297100   | 0.02196300  |
| C | -7.42860100  | -8.55999300  | -2.35805600 |
| C | -8.18270700  | -9.14465600  | -3.37073600 |
| C | -8.68050000  | -8.37256400  | -4.41908400 |
| C | -8.43158700  | -7.00149900  | -4.47131000 |
| H | 5.71287500   | -2.92030900  | -1.16371100 |
| H | 5.42403300   | -7.54230400  | 0.65283400  |
| H | -8.82359600  | -6.40834800  | -5.29304500 |
| H | 9.03370700   | -6.33776500  | -4.39521400 |
| H | 9.49578200   | -8.76659100  | -4.25030200 |
| H | 8.45486200   | -10.13841500 | -2.47989400 |
| H | 6.93156700   | -9.10214600  | -0.82117200 |
| H | 4.18391100   | -5.70496700  | 1.72610800  |
| H | 6.22992600   | 4.68787700   | 3.85575900  |
| H | 8.12978500   | 6.20710200   | 3.46984800  |
| H | 6.86414000   | 2.84531100   | 0.02845100  |
| C | 2.81997700   | -3.32872000  | 1.53718800  |
| C | 4.10422300   | -3.09539800  | 1.01205900  |
| C | 4.66041300   | -1.81236800  | 1.12155000  |
| C | 3.94178100   | -0.80156800  | 1.73493400  |
| C | 2.65411400   | -1.06608600  | 2.24517200  |
| C | 2.08277400   | -2.33285500  | 2.15616200  |

|   |              |             |             |
|---|--------------|-------------|-------------|
| C | 4.22508800   | 0.59419200  | 2.03446100  |
| C | 3.09148500   | 1.09424800  | 2.70818300  |
| N | 2.14801900   | 0.08265200  | 2.83775200  |
| C | 5.30523400   | 1.42532000  | 1.79422200  |
| C | 5.26512500   | 2.76145700  | 2.21850400  |
| C | 4.11421200   | 3.23293800  | 2.87698500  |
| C | 3.02036000   | 2.41987200  | 3.12730800  |
| C | 6.41379200   | 3.66186700  | 1.97334000  |
| C | 4.86069500   | -4.18702900 | 0.35948100  |
| C | 5.66905100   | -3.92700500 | -0.75784500 |
| C | 6.37310800   | -4.95475000 | -1.35635500 |
| C | 6.28846800   | -6.26089000 | -0.85541600 |
| C | 5.49235200   | -6.53603600 | 0.25013700  |
| C | 4.78638100   | -5.49983900 | 0.84711400  |
| C | 6.78263300   | 4.62478900  | 2.92393200  |
| C | 7.85960000   | 5.47600500  | 2.71357800  |
| C | 8.58459400   | 5.36772300  | 1.53277400  |
| C | 8.22835700   | 4.41228300  | 0.57122500  |
| C | 7.15608400   | 3.56714100  | 0.78599100  |
| C | 9.74710000   | 6.11390900  | 1.03930700  |
| C | 10.08939800  | 5.61179000  | -0.22412300 |
| C | -7.27940600  | -4.95416900 | -3.30564600 |
| C | 7.28770100   | -4.89573000 | -2.57251300 |
| C | 7.72059500   | -6.35131800 | -2.68624300 |
| C | 7.13090500   | -7.13201500 | -1.68205500 |
| C | 8.57140600   | -6.93278600 | -3.61220100 |
| C | 8.83072500   | -8.30050200 | -3.52977600 |
| C | 8.24327400   | -9.07478800 | -2.53073200 |
| C | 7.38781500   | -8.49585400 | -1.59832300 |
| C | 10.47460100  | 7.15002700  | 1.61399700  |
| C | 11.55202600  | 7.68170300  | 0.91197200  |
| C | 11.89421400  | 7.18387000  | -0.34415700 |
| C | 11.16298000  | 6.14478800  | -0.91885200 |
| H | 6.19161300   | 1.04252900  | 1.29860400  |
| H | 2.38053700   | -4.31433300 | 1.42910700  |
| H | 4.06907700   | 4.27579600  | 3.17172100  |
| H | 2.13420400   | 2.80384200  | 3.61846500  |
| H | 11.43745300  | 5.76348500  | -1.89870100 |
| H | 1.09040300   | -2.52602200 | 2.54456000  |
| H | 5.66379500   | -1.62575800 | 0.75250300  |
| H | 10.21084800  | 7.53993200  | 2.59283600  |
| H | 12.13108600  | 8.49094200  | 1.34610600  |
| H | 12.73749500  | 7.60894800  | -0.87975900 |
| H | 1.71744600   | 0.64339400  | 5.34386000  |
| H | -0.49843700  | 0.96024400  | 6.47392700  |
| H | -2.58698200  | 0.62682300  | 5.13149800  |
| H | -4.74924100  | 4.23061100  | 2.75165200  |
| H | -6.61691000  | 0.99614300  | 0.62367300  |
| H | -2.84513900  | 2.78024300  | 3.36986900  |
| H | -6.02937800  | -1.68030900 | 0.16574200  |
| H | -2.79953800  | -4.33452400 | 1.16679800  |
| H | -1.65000600  | -2.53413000 | 2.41046100  |
| H | -5.68707000  | 5.34289800  | 0.98677700  |
| H | -10.32435600 | 3.54479300  | 0.87280300  |
| H | -8.44175700  | 2.08671600  | 1.49925700  |

|   |              |              |             |
|---|--------------|--------------|-------------|
| H | -4.59750100  | -5.74840200  | 1.27123100  |
| H | -5.70336000  | -7.59460900  | 0.07490300  |
| H | -5.87877600  | -2.96596100  | -1.74047200 |
| H | -9.23769200  | 9.61172200   | -0.53050800 |
| H | -11.69327600 | 9.64921600   | -0.85144600 |
| H | -13.03572000 | 7.60576000   | -0.50270900 |
| H | -11.94302300 | 5.48613200   | 0.17448300  |
| H | -7.04218300  | -9.16438500  | -1.54257100 |
| H | -8.38502600  | -10.21094400 | -3.34445100 |
| H | -9.26708000  | -8.84317200  | -5.20210300 |
| C | -6.89224500  | 7.49095300   | -1.00918100 |
| H | -5.84296900  | 7.23392800   | -0.83210300 |
| H | -7.25776000  | 6.88321300   | -1.84148800 |
| C | 9.91115300   | 3.16823600   | -0.84641900 |
| H | 10.47288100  | 2.89148300   | 0.05009300  |
| H | 10.61657000  | 3.25761800   | -1.67879400 |
| C | -8.51082400  | -4.04391800  | -3.17531400 |
| H | -9.10621900  | -4.06766400  | -4.09361000 |
| H | -9.14912600  | -4.36008500  | -2.34550500 |
| H | -7.23903400  | 9.18149600   | 1.14981600  |
| C | -7.19287600  | 8.11935300   | 1.41074900  |
| H | -7.77544000  | 7.96559400   | 2.32335500  |
| H | -6.14817300  | 7.87134100   | 1.62437500  |
| H | 9.21662400   | 2.35506200   | -1.08102800 |
| C | 6.52292300   | -4.44008600  | -3.82555000 |
| H | 9.05392300   | 4.96724900   | -2.76100000 |
| H | -8.20703400  | -3.00689000  | -2.99942700 |
| C | -6.39989600  | -4.48527100  | -4.47599700 |
| H | -5.51750700  | -5.12167200  | -4.58536500 |
| H | -6.96184500  | -4.51397600  | -5.41504300 |
| H | 9.17206800   | -3.98835000  | -3.18100200 |
| C | 8.48985000   | -3.97074500  | -2.32503200 |
| H | 8.15802400   | -2.93730000  | -2.18158200 |
| H | 6.15970400   | -3.41448200  | -3.70484100 |
| H | 7.17507600   | -4.46508400  | -4.70448400 |
| H | 9.04790300   | -4.27821500  | -1.43623300 |
| H | 5.66255100   | -5.08656900  | -4.01894600 |
| C | 8.37128400   | 4.85086100   | -1.91312400 |
| H | 7.65309200   | 4.06396100   | -2.16491800 |
| H | 7.82157900   | 5.78741800   | -1.78520100 |
| C | 9.15008600   | 4.48714800   | -0.63875400 |
| H | -6.93494300  | 8.54302900   | -1.30863000 |

Atom coordinates for optimized S0 structure of **Ma** at B3LYP/6-31G(d) level of theory (energy= -3942.8402 a.u.)

|   |             |             |             |
|---|-------------|-------------|-------------|
| C | 0.85593800  | -0.75437800 | 2.98546000  |
| C | 0.77662200  | -0.95056600 | 4.36327900  |
| C | -0.45682200 | -0.96977200 | 5.03286500  |
| C | -1.62324500 | -0.78849100 | 4.27277300  |
| C | -1.57200100 | -0.60130600 | 2.89283700  |
| C | -0.32463900 | -0.58091100 | 2.22653700  |
| C | -0.25971000 | -0.38964800 | 0.81050000  |
| N | -0.20734700 | -0.23500300 | -0.34104900 |
| C | -4.58731400 | 2.71265700  | 3.09589100  |

|   |              |             |             |
|---|--------------|-------------|-------------|
| C | -5.74794500  | 2.51937100  | 2.31078300  |
| C | -5.84938800  | 1.35653200  | 1.53468400  |
| C | -4.81987600  | 0.41298700  | 1.54699100  |
| C | -3.67368000  | 0.63945800  | 2.34689300  |
| C | -3.54528300  | 1.79116200  | 3.12422700  |
| C | -4.61391700  | -0.85083000 | 0.86519700  |
| C | -3.35228500  | -1.34181100 | 1.27821500  |
| N | -2.77774700  | -0.42321200 | 2.16983100  |
| C | -5.39161800  | -1.60193200 | -0.01901700 |
| C | -4.92728600  | -2.83755700 | -0.48861800 |
| C | -3.66656800  | -3.30136400 | -0.04536300 |
| C | -2.87169100  | -2.57351900 | 0.83378300  |
| C | -5.74133800  | -3.64726900 | -1.42985300 |
| C | -6.83157800  | 3.53443700  | 2.30787000  |
| C | -6.52933600  | 4.91093600  | 2.33570400  |
| C | -7.55029700  | 5.85045300  | 2.32992600  |
| C | -8.89795500  | 5.44229500  | 2.29413300  |
| C | -9.21494000  | 4.08306700  | 2.26521100  |
| C | -8.18421500  | 3.14450400  | 2.27414900  |
| C | -5.80020000  | -5.04915000 | -1.31081800 |
| C | -6.56207400  | -5.82476900 | -2.18327000 |
| C | -7.28573900  | -5.19551100 | -3.19766100 |
| C | -7.23844700  | -3.79399600 | -3.33166800 |
| C | -6.47569600  | -3.02838100 | -2.46148400 |
| C | -8.15717100  | -5.73702700 | -4.24639100 |
| C | -8.63845000  | -4.66407700 | -5.02408300 |
| H | -6.78458200  | -1.71038100 | -5.19138300 |
| C | -7.44341800  | 7.37565400  | 2.34451500  |
| C | -8.91888100  | 7.77614100  | 2.32254400  |
| C | -9.74924600  | 6.63716300  | 2.29228300  |
| C | -9.47728500  | 9.04929200  | 2.32702400  |
| C | -10.87074800 | 9.18436500  | 2.30125400  |
| C | -11.69343300 | 8.05348600  | 2.27103500  |
| C | -11.13902300 | 6.77153900  | 2.26612600  |
| C | -8.53029500  | -7.05052400 | -4.53974200 |
| C | -9.38938900  | -7.28400100 | -5.61594200 |
| C | -9.86848300  | -6.22025500 | -6.38756900 |
| C | -9.49393600  | -4.90347700 | -6.09343700 |
| H | 6.92837400   | -3.82779400 | 0.02234200  |
| H | 7.81788800   | -7.09020400 | 3.68557000  |
| H | -9.87237300  | -4.08334900 | -6.69944900 |
| H | 11.48740700  | -7.05076600 | -1.48608900 |
| H | 12.62460600  | -8.91696400 | -0.30934700 |
| H | 11.83188400  | -9.67090800 | 1.91257400  |
| H | 9.88695000   | -8.56935600 | 2.99534400  |
| H | 5.97189300   | -5.46531100 | 3.88454500  |
| H | 4.65059800   | 4.92229800  | 1.34900800  |
| H | 6.07623800   | 6.66766900  | 0.34246200  |
| H | 6.18149100   | 2.00392500  | -1.41663000 |
| C | 3.96766500   | -3.97178200 | 2.68186200  |
| C | 5.19303500   | -3.57000500 | 2.10031900  |
| C | 5.32013700   | -2.25050700 | 1.64480300  |
| C | 4.25320200   | -1.35839700 | 1.77109500  |
| C | 3.04331900   | -1.79460800 | 2.36288900  |
| C | 2.88826800   | -3.10458500 | 2.81832500  |



|   |              |             |             |
|---|--------------|-------------|-------------|
| C | 4.06875000   | 0.03551900  | 1.41405600  |
| C | 2.75193300   | 0.38816000  | 1.79467200  |
| N | 2.12570600   | -0.73529100 | 2.35760300  |
| C | 4.90341000   | 0.99759500  | 0.84073900  |
| C | 4.44047400   | 2.30607800  | 0.65004100  |
| C | 3.12222200   | 2.62458100  | 1.05211500  |
| C | 2.27041900   | 1.68622100  | 1.62488400  |
| C | 5.31340500   | 3.34117200  | 0.04092500  |
| C | 6.31682000   | -4.53168400 | 1.97108500  |
| C | 7.14140300   | -4.52636300 | 0.82785800  |
| C | 8.18990400   | -5.42843500 | 0.71844500  |
| C | 8.44043700   | -6.36182300 | 1.74354700  |
| C | 7.63248500   | -6.38213600 | 2.88163700  |
| C | 6.58341000   | -5.47019200 | 2.98659700  |
| C | 5.29543400   | 4.66794700  | 0.51251300  |
| C | 6.10739800   | 5.65312500  | -0.04710600 |
| C | 6.96092600   | 5.31478800  | -1.09851200 |
| C | 6.99353600   | 3.99206200  | -1.58199500 |
| C | 6.18006300   | 3.01719700  | -1.02233700 |
| C | 7.90849300   | 6.12119500  | -1.87561300 |
| C | 8.51691100   | 5.28984900  | -2.83807000 |
| C | -8.08997000  | -3.33104800 | -4.51443000 |
| C | 9.18739700   | -5.59889600 | -0.42799400 |
| C | 10.04255600  | -6.75444100 | 0.09247400  |
| C | 9.59216600   | -7.18432900 | 1.35728900  |
| C | 11.13157400  | -7.37366400 | -0.51025300 |
| C | 11.77258000  | -8.42652000 | 0.15393800  |
| C | 11.32459600  | -8.85228600 | 1.40879600  |
| C | 10.23114800  | -8.23468000 | 2.01990000  |
| C | 8.24646000   | 7.47353400  | -1.78924200 |
| C | 9.19764100   | 7.98933300  | -2.67233000 |
| C | 9.80212800   | 7.16563600  | -3.62763400 |
| C | 9.46324700   | 5.80977300  | -3.71390000 |
| H | 5.92427000   | 0.74125400  | 0.57188800  |
| H | 3.85412200   | -5.00199600 | 3.00580400  |
| H | 2.75070900   | 3.63042400  | 0.88142200  |
| H | 1.26098500   | 1.96108500  | 1.91255700  |
| H | 9.93952600   | 5.17818100  | -4.46044700 |
| H | 1.95447900   | -3.44686100 | 3.25323300  |
| H | 6.25996200   | -1.91572100 | 1.21490200  |
| H | 7.77935100   | 8.11814400  | -1.04876100 |
| H | 9.47035500   | 9.03997500  | -2.61682600 |
| H | 10.54056500  | 7.58108400  | -4.30826000 |
| H | 1.69912700   | -1.09962000 | 4.91379000  |
| H | -2.59431600  | -0.77958000 | 4.75579900  |
| H | -4.51654800  | 3.60068900  | 3.71693800  |
| H | -6.71809100  | 1.20558200  | 0.90009400  |
| H | -2.66795900  | 1.96475600  | 3.73943600  |
| H | -6.37215100  | -1.24322600 | -0.31935100 |
| H | -3.29181000  | -4.24641900 | -0.42676800 |
| H | -1.90366000  | -2.95259200 | 1.14499200  |
| H | -5.48914500  | 5.22761700  | 2.33347700  |
| H | -10.25010600 | 3.75118200  | 2.24653600  |
| H | -8.42833600  | 2.08589200  | 2.28110100  |
| H | -5.25862400  | -5.53383300 | -0.50329700 |

|   |              |             |             |
|---|--------------|-------------|-------------|
| H | -6.59402900  | -6.90474400 | -2.06207200 |
| H | -6.41436100  | -1.94973100 | -2.58349200 |
| H | -8.84633600  | 9.93500200  | 2.34961500  |
| H | -11.31632700 | 10.17560200 | 2.30446000  |
| H | -12.77347500 | 8.17329500  | 2.25099600  |
| H | -11.78292500 | 5.89585500  | 2.24229200  |
| H | -8.16062400  | -7.88091700 | -3.94323800 |
| H | -9.68816500  | -8.30109200 | -5.85585600 |
| H | -10.53656600 | -6.41705900 | -7.22188800 |
| C | -6.69948200  | 7.89980500  | 1.09550200  |
| H | -5.66014500  | 7.55128700  | 1.08854900  |
| H | -7.18175400  | 7.55393300  | 0.17577600  |
| C | 9.11594800   | 2.86189300  | -2.39957000 |
| H | 9.63069900   | 3.14721600  | -1.47651000 |
| H | 9.85587500   | 2.82777200  | -3.20762400 |
| C | -9.22616500  | -2.38942000 | -4.05720100 |
| H | -9.86490000  | -2.11229500 | -4.90400900 |
| H | -9.85330300  | -2.86822700 | -3.29831600 |
| H | -6.72880300  | 8.97439700  | 3.65626700  |
| C | -6.74105000  | 7.87865600  | 3.62560600  |
| H | -7.25269300  | 7.51736200  | 4.52342100  |
| H | -5.70207000  | 7.53037000  | 3.65963100  |
| H | 8.71375800   | 1.85040000  | -2.26922000 |
| C | 8.47365700   | -5.97591200 | -1.74560000 |
| H | 7.98668700   | 3.39888000  | -4.87657900 |
| H | -8.81571200  | -1.46686300 | -3.63042700 |
| C | -7.22568400  | -2.63207600 | -5.58824600 |
| H | -6.41188100  | -3.28279500 | -5.92361400 |
| H | -7.83294300  | -2.36577800 | -6.46127000 |
| H | 10.78911600  | -4.47803100 | -1.41067000 |
| C | 10.03241600  | -4.32148400 | -0.63311700 |
| H | 9.39827100   | -3.48363500 | -0.94563200 |
| H | 7.81521400   | -5.16416500 | -2.07576000 |
| H | 9.20386300   | -6.16181100 | -2.54185800 |
| H | 10.54596300  | -4.03584200 | 0.29051800  |
| H | 7.86701400   | -6.87849100 | -1.62102100 |
| C | 7.27655700   | 3.42956400  | -4.04198200 |
| H | 6.84040400   | 2.42973100  | -3.93424000 |
| H | 6.47319000   | 4.12601300  | -4.30209400 |
| C | 7.98552400   | 3.85968100  | -2.73798800 |
| H | -6.68671900  | 8.99593300  | 1.08401700  |
| C | -0.52442900  | -1.17392800 | 6.49954100  |
| C | -1.57830100  | -1.89555800 | 7.08358000  |
| C | 0.46238200   | -0.64820700 | 7.35029700  |
| C | -1.63794700  | -2.08512800 | 8.46175600  |
| H | -2.34637200  | -2.33496500 | 6.45317300  |
| C | 0.39422900   | -0.83778900 | 8.72753000  |
| H | 1.27384700   | -0.05724000 | 6.93472300  |
| C | -0.65354400  | -1.56310100 | 9.31093200  |
| H | -2.46232000  | -2.65441600 | 8.88480200  |
| H | 1.16479200   | -0.40630700 | 9.36223000  |
| C | -0.70537200  | -1.79380300 | 10.80216400 |
| H | -0.12471700  | -2.68193300 | 11.08542600 |
| H | -0.28763600  | -0.94493400 | 11.35382600 |
| H | -1.73185700  | -1.95222200 | 11.14837600 |

Atom coordinates for optimized T1 structure of **Ma** at UCAM-B3LYP/6-31G(d) level of theory

|   |              |             |             |
|---|--------------|-------------|-------------|
| C | 0.82702200   | -0.82023700 | 2.86521800  |
| C | 0.77425700   | -1.01602000 | 4.23842700  |
| C | -0.44128400  | -1.00983800 | 4.92661300  |
| C | -1.61519600  | -0.80685100 | 4.19656700  |
| C | -1.58655800  | -0.61964400 | 2.82188400  |
| C | -0.35889100  | -0.62192800 | 2.13825200  |
| C | -0.31914900  | -0.42752300 | 0.72036000  |
| N | -0.28885300  | -0.27024200 | -0.42486400 |
| C | -4.58959700  | 2.67337300  | 3.14966000  |
| C | -5.75385600  | 2.49914400  | 2.37676500  |
| C | -5.86366700  | 1.36635300  | 1.57179600  |
| C | -4.83477900  | 0.42950900  | 1.54605700  |
| C | -3.68606800  | 0.63279600  | 2.33247100  |
| C | -3.54928500  | 1.75835800  | 3.13865000  |
| C | -4.63829100  | -0.81669600 | 0.83153900  |
| C | -3.38068400  | -1.31462900 | 1.21744200  |
| N | -2.79576800  | -0.42114000 | 2.11909500  |
| C | -5.42418500  | -1.54041000 | -0.06065200 |
| C | -4.96602500  | -2.75693200 | -0.56260000 |
| C | -3.70751400  | -3.23273600 | -0.14643300 |
| C | -2.90628600  | -2.53171800 | 0.73950700  |
| C | -5.78924700  | -3.54078000 | -1.51663800 |
| C | -6.84128400  | 3.50817500  | 2.42029500  |
| C | -6.54467800  | 4.87734600  | 2.47920400  |
| C | -7.56836800  | 5.80649300  | 2.51928800  |
| C | -8.90627600  | 5.39187500  | 2.49821900  |
| C | -9.21770800  | 4.03919500  | 2.43791300  |
| C | -8.18471300  | 3.11032600  | 2.40188200  |
| C | -5.85062100  | -4.93793300 | -1.42917800 |
| C | -6.61873600  | -5.68754700 | -2.31189500 |
| C | -7.34342900  | -5.03205500 | -3.29962000 |
| C | -7.29361900  | -3.63576100 | -3.40040200 |
| C | -6.52404400  | -2.89551100 | -2.52138000 |
| C | -8.22582000  | -5.54391200 | -4.35522800 |
| C | -8.70530900  | -4.45432600 | -5.09567400 |
| H | -6.85999600  | -1.50740000 | -5.19428600 |
| C | -7.46912600  | 7.32510900  | 2.57703900  |
| C | -8.94074700  | 7.71646500  | 2.59419800  |
| C | -9.76355300  | 6.58246000  | 2.54730900  |
| C | -9.50007400  | 8.98281100  | 2.64669500  |
| C | -10.88871700 | 9.11159300  | 2.65222800  |
| C | -11.70491100 | 7.98300100  | 2.60531000  |
| C | -11.14787400 | 6.70856600  | 2.55223000  |
| C | -8.60383100  | -6.84246700 | -4.67647300 |
| C | -9.46892900  | -7.04342700 | -5.74818600 |
| C | -9.94670700  | -5.96170000 | -6.48549100 |
| C | -9.56599100  | -4.65973400 | -6.16166700 |
| H | 7.61422100   | -3.27416200 | 0.83429900  |
| H | 6.92127700   | -7.95480500 | 2.52239900  |
| H | -9.94298700  | -3.82227400 | -6.74261300 |
| H | 12.42331800  | -6.19136900 | -0.11086100 |
| H | 13.02782500  | -8.54828200 | 0.38070300  |

|   |             |              |             |
|---|-------------|--------------|-------------|
| H | 11.40391300 | -10.06434400 | 1.46337900  |
| H | 9.14646500  | -9.26472000  | 2.07834100  |
| H | 5.12796400  | -6.36551200  | 2.72185600  |
| H | 4.65553100  | 4.74847400   | 1.04465500  |
| H | 6.08379500  | 6.44686900   | -0.02804600 |
| H | 6.03289900  | 1.77026600   | -1.72122000 |
| C | 3.86186700  | -4.07805500  | 2.54772100  |
| C | 5.11282000  | -3.72391300  | 1.92856600  |
| C | 5.22257000  | -2.38299900  | 1.44618700  |
| C | 4.17429600  | -1.49305900  | 1.58709600  |
| C | 2.97510300  | -1.89356700  | 2.20995800  |
| C | 2.81560800  | -3.19968200  | 2.68816000  |
| C | 3.99614100  | -0.10220000  | 1.20549600  |
| C | 2.70261600  | 0.27199000   | 1.61119800  |
| N | 2.07710300  | -0.83006600  | 2.20722300  |
| C | 4.82515900  | 0.83169300   | 0.59353600  |
| C | 4.37461300  | 2.13585800   | 0.39140400  |
| C | 3.07953600  | 2.48065900   | 0.82126200  |
| C | 2.23428200  | 1.56841800   | 1.43265300  |
| C | 5.24507400  | 3.14493700   | -0.26109700 |
| C | 6.17355600  | -4.65152500  | 1.80404400  |
| C | 7.46368100  | -4.28399800  | 1.19614900  |
| C | 8.45868800  | -5.17902800  | 1.08975300  |
| C | 8.31032900  | -6.54638700  | 1.56498800  |
| C | 7.05643100  | -6.93900500  | 2.16382000  |
| C | 6.05765500  | -6.04120900  | 2.27265200  |
| C | 5.26868900  | 4.47023800   | 0.19322600  |
| C | 6.07978900  | 5.42774400   | -0.40369200 |
| C | 6.88587100  | 5.05701800   | -1.47291700 |
| C | 6.87452500  | 3.73609700   | -1.93906400 |
| C | 6.06269000  | 2.78832700   | -1.34281700 |
| C | 7.82771900  | 5.83121500   | -2.29039800 |
| C | 8.38176300  | 4.97619000   | -3.25336100 |
| C | -8.15256900 | -3.14156000  | -4.55680500 |
| C | 9.85511500  | -4.99625500  | 0.50096400  |
| C | 10.44651000 | -6.38702600  | 0.70159900  |
| C | 9.50140500  | -7.25374500  | 1.32726500  |
| C | 11.69938100 | -6.84715000  | 0.36552500  |
| C | 12.04166800 | -8.17917900  | 0.64325400  |
| C | 11.11984600 | -9.03676600  | 1.25700100  |
| C | 9.85570900  | -8.59423300  | 1.60297700  |
| C | 8.19774800  | 7.16986000   | -2.23182000 |
| C | 9.13044500  | 7.64844500   | -3.14741100 |
| C | 9.68251200  | 6.80016100   | -4.10538100 |
| C | 9.30957200  | 5.45755400   | -4.16264700 |
| H | 5.83269300  | 0.55513700   | 0.29848200  |
| H | 3.72124300  | -5.08100000  | 2.92719600  |
| H | 2.72019800  | 3.48942000   | 0.64690000  |
| H | 1.23927800  | 1.86315500   | 1.74663900  |
| H | 9.74470200  | 4.80368600   | -4.91370500 |
| H | 1.89155800  | -3.51713900  | 3.15910800  |
| H | 6.12724600  | -2.04744000  | 0.95681000  |
| H | 7.76930100  | 7.83416500   | -1.48687200 |
| H | 9.43027500  | 8.69145200   | -3.11526500 |
| H | 10.40868400 | 7.18796400   | -4.81322800 |

|   |              |             |             |
|---|--------------|-------------|-------------|
| H | 1.70330100   | -1.18309300 | 4.77117100  |
| H | -2.57500400  | -0.78296500 | 4.69952500  |
| H | -4.51256200  | 3.54458600  | 3.79198200  |
| H | -6.74134000  | 1.22807000  | 0.94802500  |
| H | -2.66521800  | 1.91581900  | 3.74671900  |
| H | -6.40473300  | -1.17127100 | -0.34516000 |
| H | -3.34094200  | -4.16978500 | -0.55232900 |
| H | -1.93846800  | -2.92103700 | 1.03538600  |
| H | -5.50734400  | 5.20057200  | 2.46930400  |
| H | -10.25069100 | 3.70351200  | 2.42873600  |
| H | -8.42153100  | 2.05118100  | 2.38137200  |
| H | -5.30239600  | -5.44309400 | -0.64014800 |
| H | -6.65311100  | -6.76916200 | -2.21852000 |
| H | -6.46300000  | -1.81488600 | -2.61638700 |
| H | -8.87132100  | 9.86843400  | 2.68294300  |
| H | -11.33778500 | 10.09922200 | 2.69314800  |
| H | -12.78440800 | 8.09892900  | 2.61002800  |
| H | -11.78717900 | 5.83123400  | 2.51557100  |
| H | -8.23330200  | -7.68819700 | -4.10440300 |
| H | -9.77387500  | -8.05145700 | -6.01220300 |
| H | -10.62061000 | -6.13412600 | -7.31910200 |
| C | -6.75529800  | 7.88723500  | 1.33739100  |
| H | -5.71601300  | 7.54497200  | 1.30204500  |
| H | -7.25233100  | 7.56679600  | 0.41762100  |
| C | 8.93139200   | 2.55013200  | -2.80442300 |
| H | 9.48191200   | 2.83410700  | -1.90315700 |
| H | 9.64255800   | 2.48604600  | -3.63429300 |
| C | -9.27891300  | -2.21970400 | -4.06317100 |
| H | -9.92736600  | -1.92404400 | -4.89423000 |
| H | -9.89457300  | -2.71843000 | -3.30937100 |
| H | -6.74433700  | 8.88380900  | 3.91533700  |
| C | -6.75052800  | 7.79079700  | 3.85326800  |
| H | -7.24344100  | 7.40013800  | 4.74788200  |
| H | -5.71068600  | 7.44808400  | 3.85713900  |
| H | 8.50728400   | 1.55296000  | -2.64782700 |
| C | 9.78959600   | -4.62674800 | -0.98892100 |
| H | 7.74708900   | 3.08634000  | -5.24263800 |
| H | -8.86464700  | -1.30842500 | -3.61977300 |
| C | -7.30503400  | -2.41544400 | -5.61358500 |
| H | -6.49672700  | -3.05541800 | -5.97796700 |
| H | -7.92320900  | -2.12343100 | -6.46870000 |
| H | 11.67450800  | -3.86049300 | 0.88358300  |
| C | 10.65323300  | -3.93367800 | 1.27185900  |
| H | 10.18180400  | -2.95056400 | 1.17213900  |
| H | 9.30347300   | -3.65496300 | -1.12324400 |
| H | 10.79586200  | -4.56418300 | -1.41630000 |
| H | 10.70901300  | -4.17866200 | 2.33611200  |
| H | 9.22360000   | -5.37192700 | -1.55463200 |
| C | 7.06534000   | 3.14144300  | -4.38777600 |
| H | 6.61197800   | 2.15394500  | -4.25452900 |
| H | 6.27052900   | 3.85263100  | -4.62894400 |
| C | 7.82207200   | 3.56619300  | -3.11914100 |
| H | -6.74866700  | 8.98179800  | 1.35987100  |
| C | -0.48401400  | -1.21298500 | 6.39315100  |
| C | -1.53070700  | -1.92079600 | 6.99054900  |

|   |             |             |             |
|---|-------------|-------------|-------------|
| C | 0.51951000  | -0.69834000 | 7.21885300  |
| C | -1.56780000 | -2.10812000 | 8.36482500  |
| H | -2.31487500 | -2.34943900 | 6.37423000  |
| C | 0.47442900  | -0.88617200 | 8.59272700  |
| H | 1.33012300  | -0.11919400 | 6.78759400  |
| C | -0.56629300 | -1.59735500 | 9.19113100  |
| H | -2.38951400 | -2.66678200 | 8.80407000  |
| H | 1.25966300  | -0.46442700 | 9.21384000  |
| C | -0.59498400 | -1.82646700 | 10.67880900 |
| H | -0.06212900 | -2.74700400 | 10.94382800 |
| H | -0.11474100 | -1.00543300 | 11.21802400 |
| H | -1.61944300 | -1.92482300 | 11.04786900 |

*Atom coordinates for optimized SI structure of **Ma** at CAM-B3LYP/6-31G(d) level of theory*

|   |              |             |             |
|---|--------------|-------------|-------------|
| C | 0.88043800   | 0.22344400  | 3.38721300  |
| C | 0.80057400   | 0.56168200  | 4.71731100  |
| C | -0.43395200  | 0.76698000  | 5.37935300  |
| C | -1.59508600  | 0.58416100  | 4.58831400  |
| C | -1.53880200  | 0.24107900  | 3.25883100  |
| C | -0.29034300  | 0.04202400  | 2.56334300  |
| C | -0.21803700  | -0.10604200 | 1.17559400  |
| N | -0.15823100  | -0.26259900 | 0.01717000  |
| C | -4.75629600  | 3.20454600  | 2.39978200  |
| C | -5.84218600  | 2.71237000  | 1.65290900  |
| C | -5.82906400  | 1.37172900  | 1.23816400  |
| C | -4.76085800  | 0.55922800  | 1.57230100  |
| C | -3.69406600  | 1.07966300  | 2.33378200  |
| C | -3.67558800  | 2.40917400  | 2.74631700  |
| C | -4.42531200  | -0.82891400 | 1.28973500  |
| C | -3.17954000  | -1.07263000 | 1.90366300  |
| N | -2.74575800  | 0.08423800  | 2.53776200  |
| C | -5.07310900  | -1.84889500 | 0.61717800  |
| C | -4.48772800  | -3.12268700 | 0.55204400  |
| C | -3.24853200  | -3.33614400 | 1.18280400  |
| C | -2.58241700  | -2.33002400 | 1.86264600  |
| C | -5.16868200  | -4.22410200 | -0.16303000 |
| C | -6.97537200  | 3.59622600  | 1.30089800  |
| C | -6.75954800  | 4.94792100  | 0.99054000  |
| C | -7.82785100  | 5.76072200  | 0.66211000  |
| C | -9.13161100  | 5.24664200  | 0.63667700  |
| C | -9.36308000  | 3.91049400  | 0.94153400  |
| C | -8.28594500  | 3.09781300  | 1.26974600  |
| C | -5.11092600  | -5.53745900 | 0.32565900  |
| C | -5.74819800  | -6.58287100 | -0.32938800 |
| C | -6.45612800  | -6.31671300 | -1.49557100 |
| C | -6.52199600  | -5.01020100 | -1.99888100 |
| C | -5.88779100  | -3.97292800 | -1.34187400 |
| C | -7.21380900  | -7.19870600 | -2.38969700 |
| C | -7.73264000  | -6.42439400 | -3.43697000 |
| H | -6.13977200  | -3.46108200 | -4.31975100 |
| C | -7.81631100  | 7.23575400  | 0.28378400  |
| C | -9.29901200  | 7.49068100  | 0.04848300  |
| C | -10.05008600 | 6.32537800  | 0.25686800  |
| C | -9.92749300  | 8.66829300  | -0.32248500 |

|   |              |              |             |
|---|--------------|--------------|-------------|
| C | -11.31244500 | 8.67565400   | -0.48480800 |
| C | -12.05723500 | 7.51580000   | -0.27747500 |
| C | -11.43106700 | 6.33040400   | 0.09522700  |
| C | -7.45425800  | -8.56683900  | -2.32944800 |
| C | -8.22151300  | -9.15655000  | -3.32929400 |
| C | -8.73842600  | -8.38860700  | -4.37138200 |
| C | -8.49582800  | -7.01665700  | -4.43004700 |
| H | 5.75514200   | -2.91621200  | -1.18219200 |
| H | 5.38840200   | -7.55306600  | 0.58209100  |
| H | -8.90280400  | -6.42669300  | -5.24680200 |
| H | 9.09482400   | -6.33563500  | -4.39187000 |
| H | 9.52924500   | -8.77028200  | -4.26343400 |
| H | 8.44468600   | -10.14866700 | -2.52471000 |
| H | 6.90422500   | -9.11309500  | -0.88147800 |
| H | 4.14860500   | -5.71468500  | 1.65283200  |
| H | 6.25460200   | 4.65430300   | 3.88913900  |
| H | 8.17051200   | 6.16067000   | 3.53644100  |
| H | 6.93442000   | 2.81780400   | 0.06575200  |
| C | 2.81520600   | -3.32463600  | 1.47143200  |
| C | 4.10739100   | -3.09749000  | 0.96383700  |
| C | 4.67229200   | -1.81890100  | 1.09001500  |
| C | 3.95388500   | -0.80768700  | 1.70133000  |
| C | 2.65747100   | -1.06566800  | 2.19228500  |
| C | 2.07794300   | -2.32752400  | 2.08830300  |
| C | 4.24564700   | 0.58338700   | 2.01687100  |
| C | 3.10859800   | 1.08788500   | 2.68157600  |
| N | 2.15462200   | 0.08340800   | 2.78815400  |
| C | 5.33481800   | 1.40652900   | 1.79568800  |
| C | 5.30116900   | 2.74035900   | 2.23100700  |
| C | 4.14667300   | 3.21643300   | 2.87948500  |
| C | 3.04274200   | 2.41119300   | 3.10970900  |
| C | 6.45978400   | 3.63227400   | 2.00629400  |
| C | 4.86389200   | -4.18966400  | 0.31338600  |
| C | 5.69406500   | -3.92632100  | -0.78723200 |
| C | 6.39747200   | -4.95506600  | -1.38440000 |
| C | 6.29102400   | -6.26533300  | -0.89822300 |
| C | 5.47354000   | -6.54360100  | 0.19091300  |
| C | 4.76775000   | -5.50655300  | 0.78627800  |
| C | 6.82058200   | 4.58991400   | 2.96547400  |
| C | 7.90651200   | 5.43387700   | 2.77395500  |
| C | 8.64816700   | 5.32415600   | 1.60357800  |
| C | 8.30018400   | 4.37384900   | 0.63373900  |
| C | 7.21951600   | 3.53524900   | 0.82999500  |
| C | 9.82242900   | 6.06430900   | 1.12982900  |
| C | 10.18042200  | 5.56368000   | -0.12980900 |
| C | -7.33426500  | -4.96239200  | -3.28609500 |
| C | 7.33316100   | -4.89336100  | -2.58423400 |
| C | 7.75285900   | -6.35219800  | -2.70536900 |
| C | 7.13837400   | -7.13673000  | -1.71923000 |
| C | 8.61323000   | -6.93333800  | -3.62269200 |
| C | 8.85694500   | -8.30439800  | -3.54955000 |
| C | 8.24483600   | -9.08248100  | -2.56833200 |
| C | 7.37973200   | -8.50398500  | -1.64472800 |
| C | 10.54724700  | 7.09448800   | 1.71853100  |
| C | 11.63807100  | 7.62166900   | 1.03421500  |

|   |              |              |             |
|---|--------------|--------------|-------------|
| C | 11.99594900  | 7.12528600   | -0.21819200 |
| C | 11.26737500  | 6.09227400   | -0.80691600 |
| H | 6.22338700   | 1.02028100   | 1.30697000  |
| H | 2.36949100   | -4.30590700  | 1.35157300  |
| H | 4.10625000   | 4.25705300   | 3.18208800  |
| H | 2.15423300   | 2.80044400   | 3.59211500  |
| H | 11.55412400  | 5.71236800   | -1.78376100 |
| H | 1.08033800   | -2.51742800  | 2.46448300  |
| H | 5.68199500   | -1.63766500  | 0.73618800  |
| H | 10.27100200  | 7.48327100   | 2.69434800  |
| H | 12.21535400  | 8.42624600   | 1.47917400  |
| H | 12.84956400  | 7.54694100   | -0.73992400 |
| H | 1.73112800   | 0.68140800   | 5.26155800  |
| H | -2.57556400  | 0.66301300   | 5.04550700  |
| H | -4.77349300  | 4.23619000   | 2.73394900  |
| H | -6.64152500  | 0.98655400   | 0.63065200  |
| H | -2.84699500  | 2.80605500   | 3.32042700  |
| H | -6.04531000  | -1.67777000  | 0.16647100  |
| H | -2.78517200  | -4.31397000  | 1.11131800  |
| H | -1.62429500  | -2.50971500  | 2.33407400  |
| H | -5.74691500  | 5.34085700   | 0.98295500  |
| H | -10.36918600 | 3.50181900   | 0.93394200  |
| H | -8.46503700  | 2.06067900   | 1.53455100  |
| H | -4.57877400  | -5.73604300  | 1.25033100  |
| H | -5.69569400  | -7.58935000  | 0.07506900  |
| H | -5.91623300  | -2.96548900  | -1.74725000 |
| H | -9.35551100  | 9.57750900   | -0.48664300 |
| H | -11.81534200 | 9.59287700   | -0.77542200 |
| H | -13.13477900 | 7.53775000   | -0.40791100 |
| H | -12.01440200 | 5.42841600   | 0.25598600  |
| H | -7.05296300  | -9.16809100  | -1.51882900 |
| H | -8.41915900  | -10.22357800 | -3.29776400 |
| H | -9.33509600  | -8.86311300  | -5.14436600 |
| C | -6.99701400  | 7.47927300   | -0.99376800 |
| H | -5.94323700  | 7.23202500   | -0.82987800 |
| H | -7.36714800  | 6.86850000   | -1.82181300 |
| C | 9.99640200   | 3.12285300   | -0.76126500 |
| H | 10.54215600  | 2.83995000   | 0.14315000  |
| H | 10.71537900  | 3.21004000   | -1.58213700 |
| C | -8.56734900  | -4.05715600  | -3.13763300 |
| H | -9.17714800  | -4.08490000  | -4.04632200 |
| H | -9.19100500  | -4.37472500  | -2.29729700 |
| H | -7.33267200  | 9.16544600   | 1.17062400  |
| C | -7.27332900  | 8.10361700   | 1.43016700  |
| H | -7.84307900  | 7.94385500   | 2.34979700  |
| H | -6.22382200  | 7.86520700   | 1.63074700  |
| H | 9.30045000   | 2.31488000   | -1.00927600 |
| C | 6.59456700   | -4.41708000  | -3.84529900 |
| H | 9.18021600   | 4.93227300   | -2.68392200 |
| H | -8.26526100  | -3.01856700  | -2.96809600 |
| C | -6.47573100  | -4.49184100  | -4.47121000 |
| H | -5.59243300  | -5.12461700  | -4.59359200 |
| H | -7.05253700  | -4.52471300  | -5.40106900 |
| H | 9.23705400   | -4.00011700  | -3.15110100 |
| C | 8.54045200   | -3.98365400  | -2.30681800 |



|   |             |             |             |
|---|-------------|-------------|-------------|
| H | 8.21712900  | -2.94815400 | -2.15880000 |
| H | 6.23964400  | -3.38910000 | -3.72014300 |
| H | 7.26151500  | -4.43960200 | -4.71309800 |
| H | 9.07989600  | -4.30580600 | -1.41176300 |
| H | 5.73127200  | -5.05276200 | -4.06022500 |
| C | 8.48377600  | 4.81799700  | -1.84707000 |
| H | 7.76475100  | 4.03621700  | -2.11211200 |
| H | 7.93802200  | 5.75765400  | -1.72520300 |
| C | 9.24060500  | 4.44609100  | -0.56188100 |
| H | -7.05321400 | 8.53102900  | -1.29211100 |
| C | -0.50811100 | 1.13589100  | 6.79374100  |
| C | -1.62779700 | 1.79839100  | 7.32611000  |
| C | 0.53282400  | 0.84242600  | 7.69222500  |
| C | -1.69912000 | 2.14040000  | 8.66801600  |
| H | -2.45076400 | 2.07324300  | 6.67384100  |
| C | 0.45752500  | 1.19577700  | 9.03049900  |
| H | 1.40528700  | 0.29762600  | 7.34577300  |
| C | -0.65784400 | 1.85380300  | 9.55149200  |
| H | -2.58399800 | 2.65378400  | 9.03656000  |
| H | 1.28192800  | 0.94032400  | 9.69200000  |
| C | -0.72301300 | 2.25921200  | 11.00058400 |
| H | -0.17668300 | 1.55648600  | 11.63696000 |
| H | -0.28195500 | 3.25068800  | 11.16104800 |
| H | -1.75635400 | 2.30333200  | 11.35712200 |

*Atom coordinates for optimized S0 structure of Db at B3LYP/6-31G(d) level of theory (energy=-3426.8148 a.u.)*

|   |             |             |             |
|---|-------------|-------------|-------------|
| C | -1.18129300 | 0.85152700  | -2.01545100 |
| C | -1.14095500 | 1.40881700  | -3.29638700 |
| C | 0.08079800  | 1.71483200  | -3.89269000 |
| C | 1.27660700  | 1.46325200  | -3.22301000 |
| C | 1.26467400  | 0.89368100  | -1.94675600 |
| C | 0.02828200  | 0.58583700  | -1.32937900 |
| C | 0.00085200  | 0.00936500  | -0.01896500 |
| N | -0.02157200 | -0.45858100 | 1.04535700  |
| C | 4.49083400  | 3.72739900  | -0.65294400 |
| C | 5.62862500  | 3.10648600  | -0.09133900 |
| C | 5.66761900  | 1.71398700  | 0.03510000  |
| C | 4.58361900  | 0.95398600  | -0.41188800 |
| C | 3.44925800  | 1.59933400  | -0.96061800 |
| C | 3.39019300  | 2.98932200  | -1.07564600 |
| C | 4.30550100  | -0.46915700 | -0.42293800 |
| C | 3.01136200  | -0.63337500 | -0.97124200 |
| N | 2.48675600  | 0.63174300  | -1.28593500 |
| C | 5.03749300  | -1.58820700 | -0.01590700 |
| C | 4.49228300  | -2.86354600 | -0.19080000 |
| C | 3.21352300  | -3.00425700 | -0.77466800 |
| C | 2.45991800  | -1.90141100 | -1.15932900 |
| N | 5.21699000  | -4.02358100 | 0.20952700  |
| N | 6.72722200  | 3.90432700  | 0.34208100  |
| C | 4.56773100  | -5.02479700 | 0.97972100  |
| C | 6.59237700  | -4.14345800 | -0.12327600 |
| C | 6.48840700  | 5.04584900  | 1.15247600  |
| C | 8.05197700  | 3.52740800  | -0.00516100 |

|   |              |             |             |
|---|--------------|-------------|-------------|
| C | 4.84332500   | -6.38557500 | 0.76156300  |
| C | 4.20176400   | -7.36362200 | 1.51844000  |
| C | 3.26231800   | -7.01044500 | 2.48977100  |
| C | 2.97835200   | -5.65989000 | 2.70131400  |
| C | 3.62820900   | -4.67248400 | 1.96303400  |
| C | 7.51773600   | -4.63679300 | 0.81170300  |
| C | 8.86444800   | -4.75593200 | 0.47389900  |
| C | 9.31879900   | -4.37011700 | -0.78894300 |
| C | 8.40350100   | -3.86894500 | -1.71704400 |
| C | 7.05208000   | -3.76253100 | -1.39512700 |
| C | 5.49988400   | 5.01895000  | 2.15027900  |
| C | 5.25490300   | 6.14817300  | 2.92953700  |
| C | 5.99759100   | 7.31585500  | 2.74394300  |
| C | 6.98702500   | 7.34322000  | 1.75841200  |
| C | 7.22746100   | 6.22582300  | 0.96171900  |
| C | 9.09471600   | 3.62508600  | 0.93122200  |
| C | 10.39239800  | 3.25772700  | 0.58054700  |
| C | 10.67368100  | 2.76972700  | -0.69721500 |
| C | 9.63741000   | 2.66122000  | -1.62704300 |
| C | 8.33994600   | 3.04279700  | -1.29201700 |
| C | -3.23718900  | 2.65862800  | 1.57370400  |
| C | -4.53217600  | 2.15036200  | 1.82018600  |
| C | -5.05831300  | 1.16096100  | 0.98417200  |
| C | -4.29349800  | 0.69215800  | -0.08759300 |
| C | -2.98570900  | 1.19171000  | -0.29358300 |
| C | -2.45152800  | 2.18350900  | 0.53002000  |
| C | -4.54653100  | -0.27797700 | -1.13524900 |
| C | -3.38397400  | -0.32534300 | -1.94182600 |
| N | -2.42918500  | 0.55929800  | -1.41833000 |
| C | -5.63100100  | -1.10865100 | -1.42886900 |
| C | -5.56382300  | -1.95976800 | -2.53679400 |
| C | -4.39764700  | -1.98183500 | -3.33357100 |
| C | -3.29676400  | -1.18429000 | -3.03884400 |
| N | -6.66134500  | -2.80653300 | -2.86808900 |
| N | -5.29289600  | 2.65720500  | 2.91325000  |
| C | -6.42925600  | -4.18127300 | -3.13836700 |
| C | -7.98127000  | -2.28206900 | -2.86698000 |
| C | -6.66197700  | 2.98573500  | 2.72818700  |
| C | -4.68588300  | 2.78290400  | 4.19157900  |
| C | -7.14114800  | -4.84018700 | -4.15525500 |
| C | -6.90881100  | -6.18873600 | -4.41694600 |
| C | -5.95360900  | -6.90159900 | -3.68860500 |
| C | -5.23758500  | -6.24746900 | -2.68427400 |
| C | -5.47539300  | -4.90346800 | -2.40207100 |
| C | -9.04926500  | -3.02529300 | -2.33703000 |
| C | -10.34155000 | -2.50377900 | -2.34324800 |
| C | -10.59298200 | -1.23012600 | -2.85732500 |
| C | -9.53192200  | -0.48445700 | -3.37544600 |
| C | -8.23927200  | -1.00406800 | -3.39049200 |
| C | -7.08567000  | 3.63941900  | 1.55879800  |
| C | -8.43123700  | 3.94897900  | 1.37238100  |
| C | -9.37677200  | 3.63177800  | 2.34996200  |
| C | -8.95824200  | 2.98922300  | 3.51694800  |
| C | -7.61753200  | 2.65880800  | 3.70492300  |
| C | -4.96951400  | 3.88923200  | 5.01030400  |

|   |              |             |             |
|---|--------------|-------------|-------------|
| C | -4.37174900  | 4.00913400  | 6.26304100  |
| C | -3.46825900  | 3.04501200  | 6.71584500  |
| C | -3.17576100  | 1.95039300  | 5.89990500  |
| C | -3.78269100  | 1.81097200  | 4.65295600  |
| H | -2.07641500  | 1.61377100  | -3.80612500 |
| H | 0.10111300   | 2.15218700  | -4.88644600 |
| H | 2.23197900   | 1.68681000  | -3.68585900 |
| H | 4.47847900   | 4.80844200  | -0.74584800 |
| H | 6.53666600   | 1.23620200  | 0.47632900  |
| H | 2.52014600   | 3.48815700  | -1.49084000 |
| H | 6.02333700   | -1.47709600 | 0.42447800  |
| H | 2.81145700   | -4.00202100 | -0.91621400 |
| H | 1.47795800   | -2.03649800 | -1.60045000 |
| H | 5.56002400   | -6.66906600 | -0.00253700 |
| H | 4.42863300   | -8.41076200 | 1.33456600  |
| H | 2.75832000   | -7.77657300 | 3.07203900  |
| H | 2.25356300   | -5.36617800 | 3.45613800  |
| H | 3.40930400   | -3.62493500 | 2.14261800  |
| H | 7.17438500   | -4.92509400 | 1.80000200  |
| H | 9.56487000   | -5.13950600 | 1.21141100  |
| H | 10.37069600  | -4.45749600 | -1.04555600 |
| H | 8.73923600   | -3.56948300 | -2.70664700 |
| H | 6.34390500   | -3.38408600 | -2.12546300 |
| H | 4.92869700   | 4.11014300  | 2.31001100  |
| H | 4.48622800   | 6.10695400  | 3.69699400  |
| H | 5.80847500   | 8.19169900  | 3.35800400  |
| H | 7.56923100   | 8.24665300  | 1.59555800  |
| H | 7.98755700   | 6.25939800  | 0.18773300  |
| H | 8.88089800   | 3.98918500  | 1.93093000  |
| H | 11.18539600  | 3.33981400  | 1.31945800  |
| H | 11.68509800  | 2.47681000  | -0.96393500 |
| H | 9.83996600   | 2.28856000  | -2.62790700 |
| H | 7.54164700   | 2.96768100  | -2.02346300 |
| H | -2.84875300  | 3.43594700  | 2.22336900  |
| H | -6.05580800  | 0.77367700  | 1.16603200  |
| H | -1.45826200  | 2.58770600  | 0.36492500  |
| H | -6.52225600  | -1.09852200 | -0.80933900 |
| H | -4.36335800  | -2.64662000 | -4.19054300 |
| H | -2.40506100  | -1.22788500 | -3.65629900 |
| H | -7.87465100  | -4.28954300 | -4.73565700 |
| H | -7.47011600  | -6.68042900 | -5.20743500 |
| H | -5.77034400  | -7.95101400 | -3.90089200 |
| H | -4.49589700  | -6.78860200 | -2.10234700 |
| H | -4.92538700  | -4.40674200 | -1.60924800 |
| H | -8.85954600  | -4.00962100 | -1.92133600 |
| H | -11.15416500 | -3.09415400 | -1.92769700 |
| H | -11.60041700 | -0.82397900 | -2.85305300 |
| H | -9.71097100  | 0.50665600  | -3.78446300 |
| H | -7.42155800  | -0.42394000 | -3.80618800 |
| H | -6.35431100  | 3.90057600  | 0.80056600  |
| H | -8.73863900  | 4.45483900  | 0.46061300  |
| H | -10.42402700 | 3.88059900  | 2.20402300  |
| H | -9.68207500  | 2.72685500  | 4.28433200  |
| H | -7.30269900  | 2.14574100  | 4.60788600  |
| H | -5.65873200  | 4.65015100  | 4.65825700  |

|   |             |            |            |
|---|-------------|------------|------------|
| H | -4.60393000 | 4.87211800 | 6.88199600 |
| H | -2.99810100 | 3.14622600 | 7.68987900 |
| H | -2.47852500 | 1.18828700 | 6.23811600 |
| H | -3.55885900 | 0.95067900 | 4.03042500 |

*Atom coordinates for optimized T1 strcuture of Db at UCAM-B3LYP/6-31G(d) level of theory*

|   |             |             |             |
|---|-------------|-------------|-------------|
| C | -1.20185500 | 1.01968700  | -2.09343700 |
| C | -1.12662400 | 1.59740900  | -3.35463500 |
| C | 0.11084700  | 1.88606000  | -3.91541900 |
| C | 1.28005300  | 1.59178000  | -3.22749600 |
| C | 1.22408400  | 1.00276400  | -1.96830400 |
| C | -0.02451500 | 0.71675400  | -1.38953800 |
| C | -0.09181500 | 0.11695900  | -0.08884300 |
| N | -0.13372100 | -0.37729000 | 0.95538100  |
| C | 4.46089200  | 3.71234700  | -0.50510400 |
| C | 5.57019500  | 3.05045700  | 0.05109300  |
| C | 5.57984600  | 1.66199300  | 0.13201000  |
| C | 4.49156800  | 0.94428500  | -0.35772600 |
| C | 3.38757000  | 1.62688400  | -0.90058500 |
| C | 3.35748600  | 3.01670500  | -0.97041900 |
| C | 4.18619700  | -0.47060800 | -0.42932200 |
| C | 2.90924000  | -0.58414800 | -1.00746400 |
| N | 2.41828000  | 0.69635400  | -1.28141900 |
| C | 4.88418600  | -1.61566200 | -0.05238200 |
| C | 4.31896900  | -2.86356100 | -0.28929300 |
| C | 3.05373100  | -2.95499000 | -0.89706800 |
| C | 2.33354600  | -1.82737500 | -1.25153500 |
| N | 5.01360400  | -4.05118900 | 0.07072700  |
| N | 6.67657100  | 3.80815500  | 0.52537800  |
| C | 4.34467300  | -5.05094300 | 0.81564100  |
| C | 6.37738700  | -4.19514000 | -0.27828400 |
| C | 6.45129700  | 4.89240200  | 1.40559500  |
| C | 7.98906900  | 3.44095100  | 0.14453200  |
| C | 4.59031600  | -6.40628100 | 0.57056300  |
| C | 3.92816300  | -7.38265800 | 1.30230500  |
| C | 2.99713300  | -7.03095500 | 2.27460500  |
| C | 2.74240900  | -5.68458500 | 2.51203200  |
| C | 3.41363100  | -4.70025100 | 1.79824200  |
| C | 7.29109200  | -4.75714200 | 0.61896400  |
| C | 8.62692100  | -4.89564100 | 0.26564200  |
| C | 9.08084900  | -4.46102600 | -0.97528200 |
| C | 8.17643100  | -3.89127700 | -1.86553700 |
| C | 6.83562800  | -3.76540500 | -1.52773200 |
| C | 5.45246800  | 4.81792000  | 2.38138200  |
| C | 5.21885900  | 5.89212500  | 3.23020800  |
| C | 5.98352200  | 7.04987300  | 3.13540000  |
| C | 6.98294000  | 7.12403400  | 2.17020000  |
| C | 7.21155100  | 6.06253900  | 1.30523200  |
| C | 9.04158100  | 3.48936000  | 1.06413800  |
| C | 10.32620400 | 3.12828800  | 0.67982600  |
| C | 10.58308900 | 2.69487600  | -0.61670400 |
| C | 9.53592500  | 2.63480100  | -1.53037800 |
| C | 8.25182100  | 3.01124100  | -1.16006900 |
| C | -3.20814200 | 2.86001900  | 1.44279300  |

|   |              |             |             |
|---|--------------|-------------|-------------|
| C | -4.45816000  | 2.33628200  | 1.74174900  |
| C | -5.08552100  | 1.28922400  | 0.88856500  |
| C | -4.29445300  | 0.81215800  | -0.20082800 |
| C | -3.03413700  | 1.35592500  | -0.44076100 |
| C | -2.46158200  | 2.41174400  | 0.34484500  |
| C | -4.51445200  | -0.19078500 | -1.19805800 |
| C | -3.36727100  | -0.21964700 | -2.02600000 |
| N | -2.46872100  | 0.73578500  | -1.53048400 |
| C | -5.56071400  | -1.08115100 | -1.46751800 |
| C | -5.45124700  | -1.94966300 | -2.54793500 |
| C | -4.30123700  | -1.94986300 | -3.35862900 |
| C | -3.24094400  | -1.09153100 | -3.09451200 |
| N | -6.51239400  | -2.85310600 | -2.84653300 |
| N | -5.16209300  | 2.72997600  | 2.86292400  |
| C | -6.22448700  | -4.22612800 | -3.02062200 |
| C | -7.83786200  | -2.37018300 | -2.93162000 |
| C | -6.58178100  | 2.70995900  | 2.86963100  |
| C | -4.48826800  | 3.26016400  | 4.00413000  |
| C | -6.89355600  | -4.98134100 | -3.99003900 |
| C | -6.60064000  | -6.32823800 | -4.15645900 |
| C | -5.62569800  | -6.94363000 | -3.37767200 |
| C | -4.95107600  | -6.19287500 | -2.42062400 |
| C | -5.24961900  | -4.84943500 | -2.23490400 |
| C | -8.90899800  | -3.11862900 | -2.43199000 |
| C | -10.20754300 | -2.63525500 | -2.52414200 |
| C | -10.46354600 | -1.39331200 | -3.09576600 |
| C | -9.39930000  | -0.64119200 | -3.58278400 |
| C | -8.09970300  | -1.12386100 | -3.51069600 |
| C | -7.29249300  | 3.10193800  | 1.73278800  |
| C | -8.68222800  | 3.05308400  | 1.73696500  |
| C | -9.36804000  | 2.63560800  | 2.87057700  |
| C | -8.65631000  | 2.26092300  | 4.00932200  |
| C | -7.27074400  | 2.29291500  | 4.01234900  |
| C | -4.89670000  | 4.47404000  | 4.55474400  |
| C | -4.25003000  | 4.97468200  | 5.67822100  |
| C | -3.19526000  | 4.27307000  | 6.25159000  |
| C | -2.78927000  | 3.06174400  | 5.69759200  |
| C | -3.43254700  | 2.55145300  | 4.57883000  |
| H | -2.04616100  | 1.82801400  | -3.88010100 |
| H | 0.16390900   | 2.34080600  | -4.89858000 |
| H | 2.24998700   | 1.80096800  | -3.66418300 |
| H | 4.47451800   | 4.79540500  | -0.55995700 |
| H | 6.43209200   | 1.15210800  | 0.56887500  |
| H | 2.50583200   | 3.54511400  | -1.38468900 |
| H | 5.86258000   | -1.54362600 | 0.41090200  |
| H | 2.63506700   | -3.93784300 | -1.08325400 |
| H | 1.35794300   | -1.92238100 | -1.71497900 |
| H | 5.30273400   | -6.68913400 | -0.19662100 |
| H | 4.13328900   | -8.42928700 | 1.09789400  |
| H | 2.47536500   | -7.79717600 | 2.83879300  |
| H | 2.02130800   | -5.39123200 | 3.26894500  |
| H | 3.21635100   | -3.65281900 | 1.99775000  |
| H | 6.94794500   | -5.08492900 | 1.59405600  |
| H | 9.32078800   | -5.33506700 | 0.97601600  |
| H | 10.12697700  | -4.56390800 | -1.24480500 |

|   |              |             |             |
|---|--------------|-------------|-------------|
| H | 8.51278000   | -3.55087400 | -2.84032000 |
| H | 6.13338400   | -3.33117300 | -2.23095300 |
| H | 4.86096800   | 3.91338700  | 2.47072800  |
| H | 4.43828600   | 5.81468500  | 3.98110900  |
| H | 5.80288400   | 7.88463400  | 3.80484300  |
| H | 7.58450100   | 8.02330800  | 2.07717900  |
| H | 7.98239200   | 6.13404700  | 0.54574700  |
| H | 8.84696000   | 3.81125300  | 2.08123100  |
| H | 11.13013900  | 3.17299600  | 1.40840500  |
| H | 11.58679800  | 2.40586700  | -0.91099000 |
| H | 9.71934100   | 2.30274500  | -2.54785600 |
| H | 7.44227900   | 2.97292700  | -1.88071100 |
| H | -2.81532900  | 3.66191400  | 2.05666600  |
| H | -5.89199200  | 0.69578200  | 1.30022700  |
| H | -1.51150000  | 2.85995000  | 0.08709500  |
| H | -6.45096200  | -1.09911800 | -0.84805900 |
| H | -4.24869200  | -2.63547300 | -4.19659300 |
| H | -2.35294600  | -1.10091000 | -3.71798000 |
| H | -7.64396500  | -4.50575300 | -4.61199400 |
| H | -7.13172000  | -6.89705400 | -4.91396300 |
| H | -5.39432100  | -7.99489900 | -3.51562900 |
| H | -4.19056900  | -6.65776800 | -1.80032400 |
| H | -4.72847600  | -4.27317700 | -1.47849100 |
| H | -8.71772000  | -4.08108000 | -1.97049100 |
| H | -11.02468100 | -3.23245400 | -2.13041900 |
| H | -11.47902800 | -1.01587500 | -3.15971400 |
| H | -9.58057500  | 0.32890500  | -4.03608600 |
| H | -7.27604500  | -0.53686900 | -3.90159400 |
| H | -6.75337600  | 3.45581800  | 0.86219100  |
| H | -9.22846000  | 3.35628200  | 0.84950900  |
| H | -10.45276400 | 2.60474800  | 2.87180200  |
| H | -9.18484500  | 1.93078900  | 4.89789400  |
| H | -6.71407600  | 1.98565200  | 4.89083600  |
| H | -5.71599100  | 5.01990000  | 4.09969800  |
| H | -4.56953600  | 5.92175400  | 6.10120900  |
| H | -2.69112900  | 4.66712300  | 7.12808800  |
| H | -1.97159900  | 2.50466500  | 6.14342500  |
| H | -3.12536100  | 1.60678800  | 4.14426400  |

*Atom coordinates for optimized SI structure of Db at CAM-B3LYP/6-31G(d) level of theory*

|   |             |             |             |
|---|-------------|-------------|-------------|
| C | -0.79170400 | -0.92690000 | -2.32140300 |
| C | -0.78233400 | -0.91714600 | -3.69710600 |
| C | -0.00013800 | 0.00008000  | -4.41945500 |
| C | 0.78210400  | 0.91727400  | -3.69712100 |
| C | 0.79156500  | 0.92697700  | -2.32141700 |
| C | -0.00004900 | 0.00002600  | -1.54270300 |
| C | -0.00001200 | 0.00000200  | -0.15022400 |
| N | 1.58355300  | 1.89476100  | -1.63982400 |
| N | -1.58365000 | -1.89470800 | -1.63979400 |
| C | -2.96903400 | -1.94497000 | -1.63512600 |
| C | -3.39692100 | -3.03732600 | -0.85019000 |
| C | -2.19022500 | -3.67719000 | -0.35095800 |
| C | -1.10539300 | -2.93464900 | -0.86725600 |
| C | 2.96893600  | 1.94500200  | -1.63520800 |

|   |             |             |             |
|---|-------------|-------------|-------------|
| C | 3.39687200  | 3.03734100  | -0.85027500 |
| C | 2.19020500  | 3.67721800  | -0.35098900 |
| C | 1.10534200  | 2.93470200  | -0.86725500 |
| C | -3.88466300 | -1.09658600 | -2.25286400 |
| C | -5.23241500 | -1.36338900 | -2.08670300 |
| C | -5.68021400 | -2.44431900 | -1.30376300 |
| C | -4.74855800 | -3.28225500 | -0.67718000 |
| C | -1.95937600 | -4.76944100 | 0.46590100  |
| C | -0.63729600 | -5.13651700 | 0.75694200  |
| C | 0.43149000  | -4.39632200 | 0.21089600  |
| C | 0.21411000  | -3.29546200 | -0.59380100 |
| C | 1.95940500  | 4.76946400  | 0.46589200  |
| C | 0.63734300  | 5.13656000  | 0.75698600  |
| C | -0.43147500 | 4.39638600  | 0.21097400  |
| C | -0.21414400 | 3.29553300  | -0.59374500 |
| C | 3.88452700  | 1.09660900  | -2.25299200 |
| C | 5.23229100  | 1.36338600  | -2.08687700 |
| C | 5.68013700  | 2.44429800  | -1.30394000 |
| C | 4.74852000  | 3.28224300  | -0.67731100 |
| H | -1.44677900 | 4.70326800  | 0.43254600  |
| H | 5.09253800  | 4.10361300  | -0.05832200 |
| H | -1.04229100 | 2.73145700  | -1.00503300 |
| H | 3.54978700  | 0.26215100  | -2.85784400 |
| H | 5.96604000  | 0.72751700  | -2.56870900 |
| N | 0.00003800  | -0.00002900 | 1.02430600  |
| H | -1.38573000 | -1.65221600 | -4.22126900 |
| H | -0.00017400 | 0.00010000  | -5.50126700 |
| H | 1.38547300  | 1.65236200  | -4.22129200 |
| H | -3.54996100 | -0.26211400 | -2.85771700 |
| H | -5.96619300 | -0.72752800 | -2.56850100 |
| H | -5.09253700 | -4.10364000 | -0.05818700 |
| H | -2.78283200 | -5.33444300 | 0.88805900  |
| H | 1.44680600  | -4.70319100 | 0.43242400  |
| H | 1.04223200  | -2.73136800 | -1.00511400 |
| H | 2.78288800  | 5.33444800  | 0.88802300  |
| N | -7.06342400 | -2.67965100 | -1.14755100 |
| N | 7.06335900  | 2.67960300  | -1.14777600 |
| N | -0.37596200 | -6.23889200 | 1.59222600  |
| N | 0.37605400  | 6.23892900  | 1.59229600  |
| C | 0.70545400  | -6.20224300 | 2.51051700  |
| C | 1.51500900  | -7.32741800 | 2.68797000  |
| C | 0.96888800  | -5.04569900 | 3.24973200  |
| C | 2.56476700  | -7.29504600 | 3.59596800  |
| H | 1.31680500  | -8.22385500 | 2.11052900  |
| C | 2.03127000  | -5.01748300 | 4.14310000  |
| H | 0.34026400  | -4.17158900 | 3.11974000  |
| C | 2.83197400  | -6.14064300 | 4.32517100  |
| H | 3.18566100  | -8.17644600 | 3.72362000  |
| H | 2.22465100  | -4.11163200 | 4.70902500  |
| H | 3.65740100  | -6.11638800 | 5.02921700  |
| C | -0.70532800 | 6.20228000  | 2.51062500  |
| C | -1.51486600 | 7.32746200  | 2.68811800  |
| C | -0.96874800 | 5.04573200  | 3.24983800  |
| C | -2.56459300 | 7.29509200  | 3.59615200  |
| H | -1.31667300 | 8.22390200  | 2.11067700  |

|   |              |              |             |
|---|--------------|--------------|-------------|
| C | -2.03109900  | 5.01751800   | 4.14324200  |
| H | -0.34013800  | 4.17161700   | 3.11981400  |
| C | -2.83178600  | 6.14068500   | 4.32535300  |
| H | -3.18547300  | 8.17649700   | 3.72383500  |
| H | -2.22447100  | 4.11166200   | 4.70916500  |
| H | -3.65718800  | 6.11643000   | 5.02942700  |
| C | -1.21125000  | -7.38454700  | 1.54506400  |
| C | -1.63902600  | -7.99621400  | 2.72631600  |
| C | -1.61069600  | -7.91701900  | 0.31610300  |
| C | -2.44713700  | -9.12399900  | 2.67469700  |
| H | -1.33538900  | -7.58167300  | 3.68135800  |
| C | -2.43210100  | -9.03556200  | 0.27406300  |
| H | -1.27113000  | -7.45036500  | -0.60223500 |
| C | -2.85182800  | -9.64767300  | 1.45082400  |
| H | -2.77268300  | -9.58840600  | 3.60037800  |
| H | -2.73406800  | -9.43861900  | -0.68766600 |
| H | -3.48843500  | -10.52570400 | 1.41450000  |
| C | 1.21136000   | 7.38457000   | 1.54513000  |
| C | 1.63919100   | 7.99620200   | 2.72638000  |
| C | 1.61076500   | 7.91706900   | 0.31616700  |
| C | 2.44731600   | 9.12397700   | 2.67475800  |
| H | 1.33558500   | 7.58164100   | 3.68142400  |
| C | 2.43218400   | 9.03560100   | 0.27412200  |
| H | 1.27115500   | 7.45044300   | -0.60217000 |
| C | 2.85196700   | 9.64767500   | 1.45088300  |
| H | 2.77290500   | 9.58835600   | 3.60043800  |
| H | 2.73412000   | 9.43867800   | -0.68760900 |
| H | 3.48858500   | 10.52569800  | 1.41455600  |
| C | 7.95618500   | 1.59088200   | -0.97794900 |
| C | 9.18778200   | 1.57834800   | -1.63843500 |
| C | 7.61645700   | 0.51885600   | -0.14804400 |
| C | 10.06378900  | 0.51550000   | -1.46300600 |
| H | 9.45250100   | 2.40516200   | -2.28855500 |
| C | 8.49133000   | -0.54802800  | 0.00779300  |
| H | 6.66522400   | 0.52775700   | 0.37291500  |
| C | 9.72052400   | -0.55532700  | -0.64380400 |
| H | 11.01705300  | 0.52029200   | -1.98265100 |
| H | 8.21284100   | -1.37352300  | 0.65558200  |
| H | 10.40455100  | -1.38775100  | -0.51434900 |
| C | -7.95626800  | -1.59094500  | -0.97770400 |
| C | -9.18787300  | -1.57842800  | -1.63817400 |
| C | -7.61654500  | -0.51892000  | -0.14779600 |
| C | -10.06389500 | -0.51559500  | -1.46272500 |
| H | -9.45258600  | -2.40524200  | -2.28829600 |
| C | -8.49143400  | 0.54794800   | 0.00806200  |
| H | -6.66530500  | -0.52781100  | 0.37315000  |
| C | -9.72063700  | 0.55523100   | -0.64352000 |
| H | -11.01716700 | -0.52039900  | -1.98235800 |
| H | -8.21295100  | 1.37344300   | 0.65585300  |
| H | -10.40467600 | 1.38764200   | -0.51404900 |
| C | 7.56266000   | 4.00611800   | -1.14145600 |
| C | 8.54050300   | 4.39034000   | -0.21954500 |
| C | 7.08482300   | 4.94653400   | -2.05888900 |
| C | 9.03343600   | 5.68829700   | -0.22377800 |
| H | 8.90976100   | 3.66639000   | 0.49857500  |



|   |             |             |             |
|---|-------------|-------------|-------------|
| C | 7.57122500  | 6.24685600  | -2.04468500 |
| H | 6.33295400  | 4.65064000  | -2.78238700 |
| C | 8.55016300  | 6.62538500  | -1.13149600 |
| H | 9.79270300  | 5.97111900  | 0.49889100  |
| H | 7.19011600  | 6.96523300  | -2.76402400 |
| H | 8.93309000  | 7.64070900  | -1.12748400 |
| C | -7.56270300 | -4.00617400 | -1.14120600 |
| C | -8.54051400 | -4.39040300 | -0.21926300 |
| C | -7.08487600 | -4.94659000 | -2.05864400 |
| C | -9.03342700 | -5.68836800 | -0.22347200 |
| H | -8.90976300 | -3.66645200 | 0.49886000  |
| C | -7.57125800 | -6.24692000 | -2.04441400 |
| H | -6.33303100 | -4.65069100 | -2.78216400 |
| C | -8.55016400 | -6.62545600 | -1.13119500 |
| H | -9.79266900 | -5.97119600 | 0.49922000  |
| H | -7.19015700 | -6.96529700 | -2.76375800 |
| H | -8.93307500 | -7.64078600 | -1.12716400 |

*Atom coordinates for optimized S0 structure of Mb at B3LYP/6-31G(d) level of theory (energy=-3697.1912 a.u.)*

|   |             |             |             |
|---|-------------|-------------|-------------|
| C | -1.17458900 | 0.86249100  | -2.01662400 |
| C | -1.13693900 | 1.42155000  | -3.29296500 |
| C | 0.07828600  | 1.72994000  | -3.92431300 |
| C | 1.26966800  | 1.45242800  | -3.23585900 |
| C | 1.26142300  | 0.88227100  | -1.96365300 |
| C | 0.03132700  | 0.58181000  | -1.33190200 |
| C | 0.00648600  | 0.00528300  | -0.02327000 |
| N | -0.01421400 | -0.46297600 | 1.04129500  |
| C | 4.48361300  | 3.71634000  | -0.65041800 |
| C | 5.61928800  | 3.09450900  | -0.08561900 |
| C | 5.66040000  | 1.70167200  | 0.03412600  |
| C | 4.58010700  | 0.94187200  | -0.42238900 |
| C | 3.44723800  | 1.58815300  | -0.97389800 |
| C | 3.38658600  | 2.97868900  | -1.08293100 |
| C | 4.30452800  | -0.48146900 | -0.44236300 |
| C | 3.01352000  | -0.64435800 | -0.99905200 |
| N | 2.48964100  | 0.62061900  | -1.31083500 |
| C | 5.03450300  | -1.60194600 | -0.03538400 |
| C | 4.49057600  | -2.87659300 | -0.21823100 |
| C | 3.21517100  | -3.01589500 | -0.80972300 |
| C | 2.46327900  | -1.91198600 | -1.19455100 |
| N | 5.21308500  | -4.03821400 | 0.18305300  |
| N | 6.71443100  | 3.89245800  | 0.35780600  |
| C | 4.56093400  | -5.03710600 | 0.95363700  |
| C | 6.58868400  | -4.15958100 | -0.14711100 |
| C | 6.46904700  | 5.02504500  | 1.17840400  |
| C | 8.04091100  | 3.52368200  | 0.00960200  |
| C | 4.83576300  | -6.39871200 | 0.73933200  |
| C | 4.19091000  | -7.37448100 | 1.49632500  |
| C | 3.24879100  | -7.01831800 | 2.46397900  |
| C | 2.96545900  | -5.66701900 | 2.67155600  |
| C | 3.61850400  | -4.68182800 | 1.93314000  |
| C | 7.51156900  | -4.65775100 | 0.78790600  |
| C | 8.85877300  | -4.77771900 | 0.45246200  |

|   |              |             |             |
|---|--------------|-------------|-------------|
| C | 9.31648400   | -4.38808200 | -0.80798800 |
| C | 8.40380800   | -3.88205100 | -1.73603700 |
| C | 7.05191300   | -3.77463600 | -1.41656400 |
| C | 5.47637400   | 4.98531900  | 2.17170900  |
| C | 5.22443400   | 6.10608300  | 2.96087500  |
| C | 5.96391100   | 7.27801600  | 2.78983100  |
| C | 6.95724500   | 7.31823600  | 1.80866600  |
| C | 7.20475400   | 6.20944200  | 1.00220400  |
| C | 9.08260800   | 3.62007500  | 0.94743500  |
| C | 10.38209900  | 3.26017000  | 0.59583300  |
| C | 10.66670700  | 2.78090800  | -0.68450000 |
| C | 9.63162000   | 2.67354400  | -1.61578300 |
| C | 8.33225400   | 3.04765200  | -1.27978500 |
| C | -3.23488900  | 2.68555500  | 1.55835700  |
| C | -4.52792000  | 2.17474500  | 1.80977300  |
| C | -5.05236400  | 1.17820700  | 0.98139000  |
| C | -4.28816400  | 0.70513500  | -0.08903200 |
| C | -2.98253900  | 1.20865800  | -0.30093600 |
| C | -2.44954200  | 2.20663200  | 0.51620600  |
| C | -4.53817600  | -0.27351600 | -1.12922200 |
| C | -3.37603200  | -0.32136800 | -1.93693000 |
| N | -2.42572600  | 0.57168600  | -1.42159900 |
| C | -5.61940100  | -1.11083500 | -1.41637700 |
| C | -5.54951300  | -1.96850400 | -2.51883300 |
| C | -4.38439400  | -1.99058900 | -3.31711900 |
| C | -3.28662800  | -1.18645000 | -3.02911000 |
| N | -6.64429600  | -2.82209200 | -2.84371100 |
| N | -5.28878700  | 2.68622000  | 2.90119700  |
| C | -6.40724900  | -4.19869900 | -3.09864900 |
| C | -7.96508900  | -2.30068300 | -2.85258700 |
| C | -6.65676500  | 3.01673400  | 2.71361300  |
| C | -4.68211900  | 2.81390100  | 4.17930900  |
| C | -7.11606500  | -4.87161400 | -4.10861600 |
| C | -6.87842700  | -6.22201000 | -4.35547500 |
| C | -5.92084000  | -6.92326800 | -3.61907600 |
| C | -5.20769400  | -6.25529100 | -2.62181700 |
| C | -5.45070800  | -4.90920000 | -2.35441200 |
| C | -9.03409000  | -3.04173200 | -2.32135300 |
| C | -10.32725600 | -2.52267800 | -2.33675100 |
| C | -10.57907800 | -1.25346100 | -2.86153100 |
| C | -9.51720000  | -0.50990300 | -3.38100800 |
| C | -8.22354500  | -1.02713500 | -3.38684300 |
| C | -7.07856000  | 3.66375000  | 1.53974300  |
| C | -8.42334100  | 3.97486600  | 1.35041400  |
| C | -9.37032300  | 3.66589000  | 2.32922700  |
| C | -8.95380600  | 3.02991200  | 3.50053000  |
| C | -7.61392600  | 2.69801600  | 3.69163000  |
| C | -4.96602400  | 3.92119800  | 4.99675100  |
| C | -4.36790200  | 4.04314200  | 6.24910600  |
| C | -3.46367400  | 3.08021400  | 6.70297500  |
| C | -3.17078100  | 1.98475500  | 5.88830700  |
| C | -3.77798300  | 1.84328600  | 4.64173500  |
| H | -2.07795500  | 1.60744800  | -3.79902000 |
| H | 2.22780500   | 1.68933800  | -3.68539100 |
| H | 4.47023000   | 4.79780800  | -0.73839300 |

|   |              |             |             |
|---|--------------|-------------|-------------|
| H | 6.52816800   | 1.22334600  | 0.47736200  |
| H | 2.51854500   | 3.47762600  | -1.50200000 |
| H | 6.01746900   | -1.49241700 | 0.41186800  |
| H | 2.81427300   | -4.01343100 | -0.95636000 |
| H | 1.48322000   | -2.04502400 | -1.64059900 |
| H | 5.55449900   | -6.68464100 | -0.02193900 |
| H | 4.41731400   | -8.42224400 | 1.31536800  |
| H | 2.74218900   | -7.78268000 | 3.04632400  |
| H | 2.23844700   | -5.37088900 | 3.42329500  |
| H | 3.39968400   | -3.63373700 | 2.10951600  |
| H | 7.16592700   | -4.94900900 | 1.77452200  |
| H | 9.55701800   | -5.16495500 | 1.19014600  |
| H | 10.36879500  | -4.47612000 | -1.06269900 |
| H | 8.74205700   | -3.57933400 | -2.72381300 |
| H | 6.34592800   | -3.39212300 | -2.14688000 |
| H | 4.90732200   | 4.07325600  | 2.32003100  |
| H | 4.45261200   | 6.05483200  | 3.72457100  |
| H | 5.76924900   | 8.14722200  | 3.41156100  |
| H | 7.53699400   | 8.22518700  | 1.65686000  |
| H | 7.96775000   | 6.25326300  | 0.23159700  |
| H | 8.86646900   | 3.97714600  | 1.94916600  |
| H | 11.17399400  | 3.34109300  | 1.33607700  |
| H | 11.67957100  | 2.49369800  | -0.95197300 |
| H | 9.83656400   | 2.30747400  | -2.61861700 |
| H | 7.53490100   | 2.97319100  | -2.01230000 |
| H | -2.84783000  | 3.46762800  | 2.20318100  |
| H | -6.04805200  | 0.78854400  | 1.16822200  |
| H | -1.45720800  | 2.61152600  | 0.34699000  |
| H | -6.51026500  | -1.10056800 | -0.79623200 |
| H | -4.34870200  | -2.66030800 | -4.17020700 |
| H | -2.39610800  | -1.22834300 | -3.64828100 |
| H | -7.85132200  | -4.33030600 | -4.69554600 |
| H | -7.43746800  | -6.72437400 | -5.14086900 |
| H | -5.73341500  | -7.97422800 | -3.81981500 |
| H | -4.46396300  | -6.78702000 | -2.03384800 |
| H | -4.90259500  | -4.40170700 | -1.56712600 |
| H | -8.84437400  | -4.02243700 | -1.89720700 |
| H | -11.14040100 | -3.11139600 | -1.91984200 |
| H | -11.58726400 | -0.84914600 | -2.86433300 |
| H | -9.69633100  | 0.47777900  | -3.79826600 |
| H | -7.40520400  | -0.44859000 | -3.80346300 |
| H | -6.34620900  | 3.91831200  | 0.78024000  |
| H | -8.72903300  | 4.47538100  | 0.43510300  |
| H | -10.41698900 | 3.91579900  | 2.18090000  |
| H | -9.67869000  | 2.77372500  | 4.26902800  |
| H | -7.30099000  | 2.18992700  | 4.59804700  |
| H | -5.65568900  | 4.68137600  | 4.64398300  |
| H | -4.60036900  | 4.90689600  | 6.86690700  |
| H | -2.99320700  | 3.18305000  | 7.67669600  |
| H | -2.47282500  | 1.22358300  | 6.22714900  |
| H | -3.55352900  | 0.98245700  | 4.02019800  |
| C | 0.10277900   | 2.33262100  | -5.27863500 |
| C | 1.10948400   | 2.00304200  | -6.20099300 |
| C | -0.88336600  | 3.24842100  | -5.68200000 |
| C | 1.12586700   | 2.56726200  | -7.47382100 |

|   |             |            |             |
|---|-------------|------------|-------------|
| H | 1.86826700  | 1.27306300 | -5.93341200 |
| C | -0.85899100 | 3.81144200 | -6.95473300 |
| H | -1.66312900 | 3.54263400 | -4.98511600 |
| C | 0.14601300  | 3.48466900 | -7.87517800 |
| H | 1.90933300  | 2.28237500 | -8.17209600 |
| H | -1.63173300 | 4.52281100 | -7.23679800 |
| C | 0.18402800  | 4.11908400 | -9.24480600 |
| H | 0.72577700  | 5.07421100 | -9.22363200 |
| H | 0.68984600  | 3.47461700 | -9.97113200 |
| H | -0.82405500 | 4.32708200 | -9.61882600 |

*Atom coordinates for optimized T1 strcuture of Mb at UCAM-B3LYP/6-31G(d) level of theory*

|   |             |             |             |
|---|-------------|-------------|-------------|
| C | -1.10346500 | 1.05996400  | -2.33605500 |
| C | -1.02795100 | 1.54263200  | -3.61469700 |
| C | 0.21322300  | 1.77693800  | -4.26099500 |
| C | 1.37824800  | 1.46544600  | -3.49460100 |
| C | 1.31981800  | 0.97944300  | -2.21991000 |
| C | 0.06380700  | 0.74781000  | -1.54868100 |
| C | -0.02020800 | 0.23144700  | -0.25290900 |
| N | -0.12093100 | -0.18520100 | 0.83641300  |
| C | 4.29554900  | 3.72194500  | -0.31724600 |
| C | 5.36125400  | 3.07326100  | 0.33255000  |
| C | 5.43589100  | 1.68601400  | 0.33513900  |
| C | 4.45037000  | 0.95118200  | -0.32125700 |
| C | 3.38287500  | 1.61940600  | -0.95676400 |
| C | 3.29523700  | 3.01025200  | -0.95622300 |
| C | 4.22150200  | -0.46490200 | -0.51416500 |
| C | 3.02751700  | -0.58022600 | -1.25418400 |
| N | 2.52741600  | 0.68607100  | -1.52357200 |
| C | 4.90736300  | -1.61265100 | -0.12037200 |
| C | 4.41252500  | -2.85653200 | -0.49054100 |
| C | 3.22842900  | -2.94979500 | -1.24485400 |
| C | 2.52035700  | -1.82390600 | -1.62503600 |
| N | 5.10239300  | -4.04796400 | -0.11328300 |
| N | 6.36665700  | 3.85049100  | 0.98369300  |
| C | 4.40614700  | -5.05274400 | 0.59327600  |
| C | 6.47270500  | -4.18166000 | -0.43076500 |
| C | 5.98279900  | 4.77486200  | 1.97887400  |
| C | 7.72174300  | 3.66116900  | 0.63149100  |
| C | 4.68771900  | -6.40799200 | 0.38231700  |
| C | 3.99022600  | -7.38738600 | 1.07601300  |
| C | 2.98721000  | -7.04261100 | 1.97651800  |
| C | 2.69546400  | -5.69784700 | 2.17811800  |
| C | 3.39888800  | -4.70968800 | 1.50207700  |
| C | 7.36467600  | -4.78640800 | 0.46199800  |
| C | 8.70965600  | -4.90696100 | 0.13860700  |
| C | 9.19740900  | -4.41243000 | -1.06657400 |
| C | 8.31597500  | -3.79873100 | -1.95058900 |
| C | 6.96653700  | -3.68875300 | -1.64349600 |
| C | 4.90209000  | 4.49591000  | 2.82293500  |
| C | 4.50563400  | 5.41488200  | 3.78554700  |
| C | 5.18137200  | 6.62080500  | 3.93799800  |
| C | 6.25861500  | 6.90025600  | 3.10289200  |
| C | 6.65271300  | 5.99548500  | 2.12673700  |

|   |              |             |             |
|---|--------------|-------------|-------------|
| C | 8.73258800   | 3.71483300  | 1.59785200  |
| C | 10.05971700  | 3.52120700  | 1.23847500  |
| C | 10.40609600  | 3.25140300  | -0.08143200 |
| C | 9.40250500   | 3.18407400  | -1.04219200 |
| C | 8.07444500   | 3.39293800  | -0.69557100 |
| C | -2.93435100  | 3.00907700  | 1.19096600  |
| C | -4.20859300  | 2.48703600  | 1.56992600  |
| C | -4.81727700  | 1.47149100  | 0.78362900  |
| C | -4.14952400  | 0.98793700  | -0.30911700 |
| C | -2.86349000  | 1.50331200  | -0.65145200 |
| C | -2.26628500  | 2.53675400  | 0.09690500  |
| C | -4.44708100  | -0.04089600 | -1.29651800 |
| C | -3.33890700  | -0.08723600 | -2.15845500 |
| N | -2.39158600  | 0.86419600  | -1.74521700 |
| C | -5.51507500  | -0.90194500 | -1.48152000 |
| C | -5.47779500  | -1.80867400 | -2.55002300 |
| C | -4.35763400  | -1.83281100 | -3.40213800 |
| C | -3.27719500  | -0.98541100 | -3.21318000 |
| N | -6.55037900  | -2.69381700 | -2.76573400 |
| N | -4.84060900  | 2.96216300  | 2.69296300  |
| C | -6.30746700  | -4.01807400 | -3.22281700 |
| C | -7.88435100  | -2.28147800 | -2.50988500 |
| C | -6.25815500  | 2.85704200  | 2.84684800  |
| C | -4.10337000  | 3.55658600  | 3.76498000  |
| C | -7.09507200  | -4.56494300 | -4.23786900 |
| C | -6.86710300  | -5.86356600 | -4.67429200 |
| C | -5.84349000  | -6.62473200 | -4.11931400 |
| C | -5.05350500  | -6.07770300 | -3.11334100 |
| C | -5.28721200  | -4.78659500 | -2.65802900 |
| C | -8.76580800  | -3.12820700 | -1.83358100 |
| C | -10.07536700 | -2.72985500 | -1.59907600 |
| C | -10.51927100 | -1.47980500 | -2.01822700 |
| C | -9.64051200  | -0.63260800 | -2.68568200 |
| C | -8.33451500  | -1.03046600 | -2.94005800 |
| C | -7.10413900  | 3.32159200  | 1.83995400  |
| C | -8.48025900  | 3.22752400  | 2.00252800  |
| C | -9.01270500  | 2.68309900  | 3.16660700  |
| C | -8.16344600  | 2.23053800  | 4.17231400  |
| C | -6.78672300  | 2.31497400  | 4.01759400  |
| C | -4.52739900  | 4.77247600  | 4.29976100  |
| C | -3.82477100  | 5.33855600  | 5.35438400  |
| C | -2.70377300  | 4.69853600  | 5.87504300  |
| C | -2.28774200  | 3.48363600  | 5.34008900  |
| C | -2.98682400  | 2.90484300  | 4.28902000  |
| H | -1.95663200  | 1.79377000  | -4.11655600 |
| H | 2.36172000   | 1.57705300  | -3.93807300 |
| H | 4.26555700   | 4.80659000  | -0.30812800 |
| H | 6.25944200   | 1.19157900  | 0.84063800  |
| H | 2.47736500   | 3.51657600  | -1.45674700 |
| H | 5.82149600   | -1.54677300 | 0.46110500  |
| H | 2.86750800   | -3.93409900 | -1.52400900 |
| H | 1.60485900   | -1.90449600 | -2.20017000 |
| H | 5.45540500   | -6.68923900 | -0.32994500 |
| H | 4.22593100   | -8.43241600 | 0.89705000  |
| H | 2.43924000   | -7.81169800 | 2.51138300  |

|   |              |             |             |
|---|--------------|-------------|-------------|
| H | 1.91709400   | -5.40756700 | 2.87753100  |
| H | 3.16812200   | -3.66419600 | 1.67257500  |
| H | 6.99786100   | -5.16032100 | 1.41145400  |
| H | 9.38440600   | -5.37977200 | 0.84619800  |
| H | 10.25071000  | -4.50156000 | -1.31222800 |
| H | 8.67764400   | -3.40839600 | -2.89727000 |
| H | 6.28435300   | -3.21659700 | -2.34167300 |
| H | 4.37560300   | 3.55385200  | 2.71851000  |
| H | 3.66462500   | 5.17637100  | 4.43004800  |
| H | 4.87262300   | 7.33396200  | 4.69555600  |
| H | 6.79304100   | 7.84077500  | 3.19980200  |
| H | 7.48312900   | 6.23130100  | 1.47058400  |
| H | 8.47208200   | 3.90700900  | 2.63275200  |
| H | 10.82806700  | 3.56693300  | 2.00466100  |
| H | 11.44369600  | 3.09271800  | -0.35689900 |
| H | 9.65336700   | 2.97624500  | -2.07815100 |
| H | 7.29922500   | 3.34651100  | -1.45223500 |
| H | -2.50403000  | 3.81154800  | 1.77539200  |
| H | -5.77687700  | 1.06469300  | 1.07704700  |
| H | -1.30506200  | 2.94181700  | -0.19425400 |
| H | -6.36626600  | -0.89128300 | -0.81023500 |
| H | -4.34323500  | -2.53505400 | -4.22713500 |
| H | -2.41987400  | -1.01386900 | -3.87533300 |
| H | -7.88512000  | -3.96759200 | -4.68018300 |
| H | -7.48718900  | -6.27704600 | -5.46363200 |
| H | -5.66266900  | -7.63629300 | -4.46791500 |
| H | -4.25554400  | -6.66315900 | -2.66741700 |
| H | -4.67891800  | -4.36774900 | -1.86346300 |
| H | -8.41875600  | -4.09895100 | -1.49659500 |
| H | -10.74953700 | -3.39954600 | -1.07410300 |
| H | -11.54192200 | -1.16991700 | -1.82926500 |
| H | -9.97671200  | 0.34131800  | -3.02806300 |
| H | -7.65706500  | -0.37566800 | -3.47775800 |
| H | -6.68184200  | 3.76180200  | 0.94291600  |
| H | -9.13707800  | 3.59217800  | 1.21978300  |
| H | -10.08816900 | 2.61463500  | 3.29211100  |
| H | -8.57377200  | 1.80300700  | 5.08109900  |
| H | -6.11886100  | 1.95910200  | 4.79437000  |
| H | -5.39810100  | 5.26856700  | 3.88506300  |
| H | -4.15159400  | 6.28753000  | 5.76642400  |
| H | -2.15664400  | 5.14529400  | 6.69853000  |
| H | -1.41980100  | 2.97532800  | 5.74637500  |
| H | -2.67382300  | 1.95118600  | 3.87769100  |
| C | 0.29230600   | 2.30712200  | -5.61671300 |
| C | 1.45606400   | 2.93452600  | -6.10423500 |
| C | -0.78831500  | 2.22084100  | -6.51691200 |
| C | 1.52785300   | 3.43666300  | -7.39387500 |
| H | 2.31565600   | 3.05316800  | -5.45270100 |
| C | -0.70987100  | 2.73270800  | -7.80250900 |
| H | -1.69926200  | 1.71266800  | -6.21644400 |
| C | 0.44737300   | 3.35483700  | -8.27451400 |
| H | 2.44773200   | 3.91450100  | -7.72351200 |
| H | -1.56766400  | 2.63326900  | -8.46406900 |
| C | 0.51934900   | 3.93367200  | -9.66322500 |
| H | 0.22646900   | 4.99103700  | -9.67665500 |

|   |             |            |              |
|---|-------------|------------|--------------|
| H | 1.53405800  | 3.87579100 | -10.06899100 |
| H | -0.14799300 | 3.40541200 | -10.35106600 |

*Atom coordinates for optimized SI strcuture of Mb at CAM-B3LYP/6-31G(d) level of theory*

|   |             |             |             |
|---|-------------|-------------|-------------|
| C | -1.14125700 | 1.34267400  | -2.30188000 |
| C | -1.04287800 | 2.00728100  | -3.49993900 |
| C | 0.20072000  | 2.29990100  | -4.08756000 |
| C | 1.35341700  | 1.84291600  | -3.37232900 |
| C | 1.27224200  | 1.18435900  | -2.17944800 |
| C | 0.00674900  | 0.90262200  | -1.55109400 |
| C | -0.12310000 | 0.29023300  | -0.30458100 |
| N | -0.28304400 | -0.22213500 | 0.73747400  |
| C | 4.44892100  | 3.55063900  | -0.09780700 |
| C | 5.48826400  | 2.78028200  | 0.45443500  |
| C | 5.47590600  | 1.39731500  | 0.32374300  |
| C | 4.43034500  | 0.78968100  | -0.36876500 |
| C | 3.39158100  | 1.57796200  | -0.90615900 |
| C | 3.39084200  | 2.96496700  | -0.77064600 |
| C | 4.10922200  | -0.58536800 | -0.68624200 |
| C | 2.89242800  | -0.55869300 | -1.39703200 |
| N | 2.46525000  | 0.75495300  | -1.53053200 |
| C | 4.73334900  | -1.80344700 | -0.42324300 |
| C | 4.15499700  | -2.97509900 | -0.89418400 |
| C | 2.94994600  | -2.92623500 | -1.61837000 |
| C | 2.30206700  | -1.72973000 | -1.86812400 |
| N | 4.77900600  | -4.23581300 | -0.65104900 |
| N | 6.55537900  | 3.43000800  | 1.14546500  |
| C | 4.04237500  | -5.25756000 | -0.01349900 |
| C | 6.13220600  | -4.41694600 | -1.01558600 |
| C | 6.25358000  | 4.27525300  | 2.23540200  |
| C | 7.88770900  | 3.18857500  | 0.74274300  |
| C | 4.23840200  | -6.60272700 | -0.34943700 |
| C | 3.50289300  | -7.59870500 | 0.27817800  |
| C | 2.54547200  | -7.27882600 | 1.23577300  |
| C | 2.33814600  | -5.94274800 | 1.56149600  |
| C | 3.08035100  | -4.93984100 | 0.95182400  |
| C | 7.00704100  | -5.14765700 | -0.20387900 |
| C | 8.33558200  | -5.31274400 | -0.57248200 |
| C | 8.82448800  | -4.74004000 | -1.74204700 |
| C | 7.96084100  | -4.00168300 | -2.54451300 |
| C | 6.62689500  | -3.84547300 | -2.19294000 |
| C | 5.17957900  | 3.97997500  | 3.08218200  |
| C | 4.86453300  | 4.82371800  | 4.13918400  |
| C | 5.61671900  | 5.96760500  | 4.38373900  |
| C | 6.68762600  | 6.26270800  | 3.54585600  |
| C | 7.00067600  | 5.43448200  | 2.47678600  |
| C | 8.91893500  | 3.08771500  | 1.68349700  |
| C | 10.22309500 | 2.84442100  | 1.27373900  |
| C | 10.52494800 | 2.67766800  | -0.07384400 |
| C | 9.50021300  | 2.76395900  | -1.01050000 |
| C | 8.19588000  | 3.02358800  | -0.61205100 |
| C | -3.40263600 | 3.62077900  | 0.76392200  |
| C | -4.59982900 | 3.00576500  | 1.20059100  |
| C | -5.01423500 | 1.78195300  | 0.61437200  |

|   |             |             |             |
|---|-------------|-------------|-------------|
| C | -4.23511700 | 1.21438500  | -0.36147400 |
| C | -3.03734000 | 1.84644400  | -0.77643000 |
| C | -2.61738700 | 3.05432700  | -0.21656100 |
| C | -4.32895500 | -0.02154800 | -1.13953100 |
| C | -3.18375800 | -0.04966800 | -1.96486200 |
| N | -2.42735900 | 1.08481300  | -1.73981700 |
| C | -5.23499000 | -1.05484000 | -1.17453600 |
| C | -5.00162800 | -2.14239100 | -2.04928700 |
| C | -3.85221700 | -2.14387700 | -2.86758600 |
| C | -2.93758100 | -1.10841500 | -2.83348300 |
| N | -5.89752700 | -3.20655300 | -2.08877600 |
| N | -5.36084800 | 3.58348000  | 2.20265900  |
| C | -5.46195700 | -4.51807600 | -2.44235400 |
| C | -7.27402000 | -3.01758300 | -1.77611000 |
| C | -6.76008300 | 3.32637100  | 2.30723400  |
| C | -4.77129500 | 4.45299700  | 3.17019900  |
| C | -6.17120800 | -5.25300400 | -3.39222100 |
| C | -5.76161000 | -6.53899200 | -3.71999500 |
| C | -4.63962100 | -7.09526500 | -3.11424000 |
| C | -3.93165000 | -6.35954400 | -2.16899300 |
| C | -4.34288900 | -5.07861300 | -1.82484000 |
| C | -7.91511000 | -3.89239100 | -0.89800700 |
| C | -9.26247500 | -3.72150800 | -0.60965700 |
| C | -9.97815600 | -2.67474300 | -1.18271600 |
| C | -9.33792100 | -1.80202900 | -2.05654800 |
| C | -7.99393800 | -1.97445200 | -2.36161200 |
| C | -7.58758600 | 3.47698000  | 1.19370600  |
| C | -8.95059100 | 3.23497600  | 1.30709400  |
| C | -9.49748600 | 2.85884400  | 2.52955400  |
| C | -8.67173500 | 2.72132200  | 3.64123500  |
| C | -7.30645600 | 2.94954500  | 3.53398900  |
| C | -5.36064700 | 5.68735800  | 3.44069100  |
| C | -4.80356900 | 6.52296400  | 4.39979200  |
| C | -3.65601100 | 6.13787800  | 5.08566700  |
| C | -3.06991000 | 4.90580300  | 4.81309700  |
| C | -3.62701500 | 4.05857900  | 3.86427700  |
| H | -1.96198500 | 2.33278200  | -3.97615100 |
| H | 2.34047400  | 1.98084000  | -3.79959900 |
| H | 4.48565900  | 4.62905800  | 0.01606200  |
| H | 6.27861900  | 0.80773700  | 0.75525200  |
| H | 2.59296800  | 3.56523800  | -1.19320800 |
| H | 5.66348900  | -1.84679000 | 0.13443600  |
| H | 2.52332800  | -3.85660800 | -1.97822200 |
| H | 1.36868200  | -1.70204000 | -2.41873300 |
| H | 4.97013600  | -6.86277800 | -1.10623300 |
| H | 3.67276400  | -8.63554700 | 0.00282900  |
| H | 1.96821400  | -8.06015900 | 1.71970300  |
| H | 1.59714300  | -5.67182100 | 2.30770700  |
| H | 2.91592500  | -3.90224400 | 1.21956900  |
| H | 6.64021500  | -5.58376600 | 0.71864900  |
| H | 8.99741000  | -5.88332100 | 0.07243400  |
| H | 9.86539700  | -4.86466100 | -2.02258500 |
| H | 8.32379100  | -3.54840300 | -3.46220700 |
| H | 5.95800400  | -3.27518000 | -2.82787800 |
| H | 4.59352300  | 3.08505800  | 2.90551200  |



|   |              |             |             |
|---|--------------|-------------|-------------|
| H | 4.02690900   | 4.57409900  | 4.78379700  |
| H | 5.37136900   | 6.62142500  | 5.21447600  |
| H | 7.28092200   | 7.15661200  | 3.71472900  |
| H | 7.82721300   | 5.68298300  | 1.82033300  |
| H | 8.69216400   | 3.19875400  | 2.73800900  |
| H | 11.00775800  | 2.76955300  | 2.02086900  |
| H | 11.54426700  | 2.47987200  | -0.38936200 |
| H | 9.71637000   | 2.63831000  | -2.06731600 |
| H | 7.40451600   | 3.09741000  | -1.34959700 |
| H | -3.10497500  | 4.56261400  | 1.20581800  |
| H | -5.91602200  | 1.29495800  | 0.96417900  |
| H | -1.70616000  | 3.53374000  | -0.55241200 |
| H | -6.10336200  | -1.06042000 | -0.52694900 |
| H | -3.68972600  | -2.97414400 | -3.54287200 |
| H | -2.06242600  | -1.11215300 | -3.47207900 |
| H | -7.04026900  | -4.81247900 | -3.86900200 |
| H | -6.31805700  | -7.10432400 | -4.46072500 |
| H | -4.31890100  | -8.09818400 | -3.37615400 |
| H | -3.05963500  | -6.78754600 | -1.68521400 |
| H | -3.80038300  | -4.50894500 | -1.07783300 |
| H | -7.35261200  | -4.70219600 | -0.44616800 |
| H | -9.75264400  | -4.40622800 | 0.07499400  |
| H | -11.03018300 | -2.54242000 | -0.95236800 |
| H | -9.89009900  | -0.98944800 | -2.51793100 |
| H | -7.49781500  | -1.30751000 | -3.05880300 |
| H | -7.15986600  | 3.78987900  | 0.24701200  |
| H | -9.58883200  | 3.35585700  | 0.43773700  |
| H | -10.56361300 | 2.67722800  | 2.61688300  |
| H | -9.09035000  | 2.42628400  | 4.59794800  |
| H | -6.65772000  | 2.83653400  | 4.39579200  |
| H | -6.25105800  | 5.98588600  | 2.89787300  |
| H | -5.26497600  | 7.48353300  | 4.60488700  |
| H | -3.22083500  | 6.79476100  | 5.83155300  |
| H | -2.17951300  | 4.59396000  | 5.34908500  |
| H | -3.18008600  | 3.09161200  | 3.65921600  |
| C | 0.31130200   | 3.02047400  | -5.35567600 |
| C | 1.48105600   | 3.71603400  | -5.71124600 |
| C | -0.74101400  | 3.05405800  | -6.28903300 |
| C | 1.58569500   | 4.39749800  | -6.91422600 |
| H | 2.31902800   | 3.74363100  | -5.02222000 |
| C | -0.63178900  | 3.74548500  | -7.48550900 |
| H | -1.65310100  | 2.50018000  | -6.08988200 |
| C | 0.53219800   | 4.43527300  | -7.82859700 |
| H | 2.50964400   | 4.92270300  | -7.14494100 |
| H | -1.46851300  | 3.73555400  | -8.18034800 |
| C | 0.63768600   | 5.20571500  | -9.11865900 |
| H | 0.28991300   | 6.23964200  | -9.00144500 |
| H | 1.67173200   | 5.25155400  | -9.47339900 |
| H | 0.03172600   | 4.74937200  | -9.90742300 |
